# Supplementary material for: Comprehensive identification of sexually dimorphic genes in diverse cattle tissues using RNA-seq
Source: PubMed Central journal article supplement (PMC4728830; doi:10.1186/s12864-016-2400-4), 2016-01-27
Supplement: 12864_2016_2400_MOESM1_ESM.pdf [file 12864_2016_2400_MOESM1_ESM.pdf]

# Comprehensive identification of sexually dimorphic genes in diverse cattle tissues using RNA-seq

## Supplementary Tables

|                                                                                                                                                                                      |    |
|--------------------------------------------------------------------------------------------------------------------------------------------------------------------------------------|----|
| Table S1. Clean reads rate and mapping rate .....                                                                                                                                    | 4  |
| Table S2. Number of annotated genes in each chromosome (autosomes and sex-chromosomes).....                                                                                          | 6  |
| Table S3. Enrichment analysis for male-biasness based on the Fisher's-exact test.....                                                                                                | 7  |
| Table S4. Number of significant detected DEGs in each chromosome (FDR adjusted P-value < 0.05).....                                                                                  | 8  |
| Table S5. Top-20 most significant genes from the M2 model out of a total of 655. ....                                                                                                | 9  |
| Table S6. Proportion of overlapped genes between M1 (each-tissue model) and M2 (integrated model).....                                                                               | 10 |
| Table S7. Significant biological terms from DAVID enrichment test with DEGs from the M2 (FDR < 0.05) based on several biological databases such as gene ontology and KEGG. ....      | 11 |
| Table S8. Set of 14 detected clusters of biological terms derived from DAVID annotation clustering.....                                                                              | 13 |
| Table S9. Primer sequences used in real-time PCR analysis of cattle tissues .....                                                                                                    | 17 |
| Table S10. Primer sequences used in real-time PCR analysis of rat tissues .....                                                                                                      | 19 |
| Table S11. The significant gene set from DAVID enrichment test with DEGs from fat tissue (FDR < 0.2) and several gene-set databases such as gene ontology and KEGG. ....             | 21 |
| Table S12. The significant gene set from DAVID enrichment test with DEGs from liver tissue (FDR < 0.2) and several gene-set databases such as gene ontology and KEGG. ....           | 22 |
| Table S13. The significant gene set from DAVID enrichment test with DEGs from muscle tissue (FDR < 0.2) and several gene-set databases such as gene ontology and KEGG. ....          | 23 |
| Table S14. The significant gene set from DAVID enrichment test with DEGs from pituitary-gland tissue (FDR < 0.2) and several gene-set databases such as gene ontology and KEGG. .... | 27 |

## Supplementary Figures

|                                                                                                                                                                                                                                                                                                                                                                                                                                                                                                                                                                                         |    |
|-----------------------------------------------------------------------------------------------------------------------------------------------------------------------------------------------------------------------------------------------------------------------------------------------------------------------------------------------------------------------------------------------------------------------------------------------------------------------------------------------------------------------------------------------------------------------------------------|----|
| Figure S1. Exploration of gender biases and chromosomal effects on tissues.....                                                                                                                                                                                                                                                                                                                                                                                                                                                                                                         | 30 |
| Figure S2. Manhattan plot for allocating sexual dimorphic genes from located chromosomal position with y-axis is a $-\log_{10}$ transformed FDR adjusting P-values.....                                                                                                                                                                                                                                                                                                                                                                                                                 | 31 |
| Figure S3. Overlapped Manhattan plot across the all tissues for allocating sexual dimorphic genes from located chromosomal position with y-axis is a $\log_2$ fold changes between female and male. Total 13,148 genes were visualized in this plot.....                                                                                                                                                                                                                                                                                                                                | 32 |
| Figure S4. Separated Manhattan plots for significantly observed genes in M1 .....                                                                                                                                                                                                                                                                                                                                                                                                                                                                                                       | 33 |
| Figure S5. Venn-diagram for M1 (each-tissue model) and M2 (integrated model).....                                                                                                                                                                                                                                                                                                                                                                                                                                                                                                       | 34 |
| Figure S6. Box plots for comparison between M1 and M2. (A) Representative significant genes in M1 (tissue separately model). (B) Representative significant genes in M2 (Integrated model). Y-axis represent normalized values by TMM normalization using edgeR and X-axis represent gender. Four colored lines were drew in each tissues, which is connected between average of female and male expression values, respectively.....                                                                                                                                                   | 35 |
| Figure S7. Line plots for comparison between M1 and M2. (A) Representative significant genes in M1 (tissue separately model). (B) Representative significant genes in M2 (Integrated model). Y-axis represent normalized values by TMM normalization using edgeR and X-axis represent gender. Four colored lines were drew in each tissues, which is connected between average of female and male expression values, respectively.....                                                                                                                                                  | 36 |
| Figure S8. Manhattan plots. (A) FDR adjusted P-value of the M1 method for each sampled tissue and chromosomal location. (B) FDR adjusted P-value of the M2 method. Red marked genes are significant in M2 under $FDR < 0.05$ . .....                                                                                                                                                                                                                                                                                                                                                    | 37 |
| Figure S9. Visualizing densities of the FDR adjusted p-values from M1 for 655 detected DEGs from M2. The red-vertical line represents 5% significance level. ....                                                                                                                                                                                                                                                                                                                                                                                                                       | 38 |
| Figure S10. Hierarchical clustering analysis of 40 sexual dimorphic genes for qRT-PCR validation of RNA-seq results. Three trees were visualized with optimal number of clusters based on the Silhouette score. The colors represent estimated groups derived from hierarchical clustering and its optimal number of clusters, respectively. (A) qRT-PCR for cattle species with 32 samples ( $k=7$ ). (B) RNA-seq result for cattle species ( $k=4$ ). (C) qRT-PCR for rat species with 40 samples ( $k=4$ ). (D) Silhouette score plot for detecting optimal number of clusters. .... | 39 |
| Figure S11. Gene expression patterns for annotating 8 Y-linked genes based on bosTau7 genome. ....                                                                                                                                                                                                                                                                                                                                                                                                                                                                                      | 40 |
| Figure S12. Detected three male-over-expressed genes ( $FDR$ adjusted P-value $< 0.1$ ) .....                                                                                                                                                                                                                                                                                                                                                                                                                                                                                           | 41 |
| Figure S13. Box-plot describing gene expression of XIST .....                                                                                                                                                                                                                                                                                                                                                                                                                                                                                                                           | 42 |
| Figure S14. The correlation plot for comparison between two statistical analysis tools such as edgeR and DESeq2. Spearman correlation coefficients were employed with each P-value derived from different hypothesis tests. Higher correlation coefficients (0.66 to 0.85) were observed in same hypothesis tests                                                                                                                                                                                                                                                                       |    |

|                                                                                                                                                                                                                                                                                                                                                                                                           |    |
|-----------------------------------------------------------------------------------------------------------------------------------------------------------------------------------------------------------------------------------------------------------------------------------------------------------------------------------------------------------------------------------------------------------|----|
| across the edgeR and DESeq2.....                                                                                                                                                                                                                                                                                                                                                                          | 43 |
| Figure S15. Venn diagram of DEGs list (FDR adjusted P-value < 0.05) for comparison between two statistical analysis tools such as edgeR and DESeq2. In the DESeq2, relatively large number of DEGs were significantly detected compared to the edgeR.....                                                                                                                                                 | 44 |
| Figure S16. Venn diagram of DEGs list (FDR adjusted P-value < 0.05) for comparison between two statistical analysis tools such as edgeR and DESeq2. The larger number of detected genes in M1 than M2, which were observed in edgeR and DESeq2.....                                                                                                                                                       | 45 |
| Figure S17. Tissue specificity of the detected DEGs using edgeR and DESeq2, respectively. Number of detected genes and tissue specific genes by FDR cutoff and their tissue specificity calculation. While edgeR and DESeq2 generate almost same result (Relatively Higher tissue specificity of the Muscle and pituitary gland and relatively lower tissue specificity of the liver and fat tissue)..... | 46 |
| Figure S18. Comparative heatmap between bovine and rat qRT-PCR results. The intensities represent FM:M ratio (Female gene expression / Male gene expression). .....                                                                                                                                                                                                                                       | 47 |

**Table S1. Clean reads rate and mapping rate**

| <b>Sample index</b> | <b># of surviving reads</b> | <b>rate of surviving reads</b> | <b>Mapping rate</b> |
|---------------------|-----------------------------|--------------------------------|---------------------|
| <b>Sample 1</b>     | 26179974                    | 99.62%                         | 87.80%              |
| <b>Sample 2</b>     | 25503691                    | 99.50%                         | 87.10%              |
| <b>Sample 3</b>     | 19064029                    | 89.72%                         | 85.20%              |
| <b>Sample 4</b>     | 20322303                    | 99.58%                         | 84.30%              |
| <b>Sample 5</b>     | 20076920                    | 99.46%                         | 85.30%              |
| <b>Sample 6</b>     | 21938115                    | 99.21%                         | 75.60%              |
| <b>Sample 7</b>     | 25050800                    | 99.20%                         | 82.30%              |
| <b>Sample 8</b>     | 22777313                    | 99.61%                         | 83.80%              |
| <b>Sample 9</b>     | 22708528                    | 98.80%                         | 88.20%              |
| <b>Sample 10</b>    | 19883540                    | 99.56%                         | 85.60%              |
| <b>Sample 11</b>    | 20330861                    | 99.00%                         | 87.30%              |
| <b>Sample 12</b>    | 21300243                    | 99.29%                         | 84.80%              |
| <b>Sample 13</b>    | 17647513                    | 99.56%                         | 86.20%              |
| <b>Sample 14</b>    | 23809821                    | 99.11%                         | 81.30%              |
| <b>Sample 15</b>    | 23366099                    | 99.55%                         | 82.90%              |
| <b>Sample 16</b>    | 17000674                    | 99.69%                         | 83.50%              |
| <b>Sample 17</b>    | 18827861                    | 98.82%                         | 87.00%              |
| <b>Sample 18</b>    | 18400226                    | 93.04%                         | 71.00%              |
| <b>Sample 19</b>    | 20686365                    | 99.22%                         | 84.50%              |
| <b>Sample 20</b>    | 19809624                    | 99.29%                         | 82.80%              |
| <b>Sample 21</b>    | 17093784                    | 99.62%                         | 85.50%              |
| <b>Sample 22</b>    | 15789538                    | 99.67%                         | 84.20%              |
| <b>Sample 23</b>    | 17106191                    | 99.61%                         | 85.60%              |
| <b>Sample 24</b>    | 16552140                    | 99.50%                         | 83.20%              |
| <b>Sample 25</b>    | 13505439                    | 93.99%                         | 60.20%              |
| <b>Sample 26</b>    | 26228360                    | 97.65%                         | 71.50%              |
| <b>Sample 27</b>    | 28451747                    | 97.08%                         | 70.70%              |
| <b>Sample 28</b>    | 28189426                    | 98.12%                         | 71.60%              |
| <b>Sample 29</b>    | 16430150                    | 99.25%                         | 85.70%              |
| <b>Sample 30</b>    | 16241661                    | 99.78%                         | 82.80%              |
| <b>Sample 31</b>    | 22247985                    | 99.40%                         | 76.50%              |
| <b>Sample 32</b>    | 18015690                    | 99.53%                         | 81.40%              |
| <b>Sample 33</b>    | 32493117                    | 99.72%                         | 84.60%              |
| <b>Sample 34</b>    | 16722272                    | 99.63%                         | 82.90%              |
| <b>Sample 35</b>    | 15578083                    | 99.50%                         | 84.80%              |
| <b>Sample 36</b>    | 32141655                    | 99.56%                         | 81.40%              |
| <b>Sample 37</b>    | 25664836                    | 99.34%                         | 85.30%              |

|                  |             |        |        |
|------------------|-------------|--------|--------|
| <b>Sample 38</b> | 23968355    | 99.15% | 76.50% |
| <b>Sample 39</b> | 19579272    | 99.63% | 83.10% |
| <b>Sample 40</b> | 20413006    | 99.34% | 82.30% |
| <b>AVERAGE</b>   | 21177430.18 | 98.75% | 81.91% |

**Table S2. Number of annotated genes in each chromosome (autosomes and sex-chromosomes)**

| <b>Chr.</b> | <b># of genes</b> | <b>Chr.</b> | <b># of genes</b> | <b>Chr.</b>    | <b># of genes</b> |
|-------------|-------------------|-------------|-------------------|----------------|-------------------|
| chr1        | 535               | chr12       | 221               | chr23          | 400               |
| chr2        | 593               | chr13       | 480               | chr24          | 168               |
| chr3        | 819               | chr14       | 263               | chr25          | 476               |
| chr4        | 435               | chr15       | 443               | chr26          | 241               |
| chr5        | 774               | chr16       | 363               | chr27          | 141               |
| chr6        | 378               | chr17       | 364               | chr28          | 183               |
| chr7        | 733               | chr18       | 700               | chr29          | 364               |
| chr8        | 431               | chr19       | 811               | chrUn          | 538               |
| chr9        | 288               | chr20       | 205               | chrX           | 350               |
| chr10       | 545               | chr21       | 354               | chrY           | 10                |
| chr11       | 584               | chr22       | 380               | Total : 13,570 |                   |

**Table S3. Enrichment analysis for male-biasness based on the Fisher's-exact test**

| <b>Tissues</b>         | <b>Number of Male-biased genes</b> | <b>Number of Female-biased genes</b> | <b>Criteria for DEG</b> | <b>Enrichment analysis for Male-biased</b> |
|------------------------|------------------------------------|--------------------------------------|-------------------------|--------------------------------------------|
| <b>Liver</b>           | 8                                  | 16                                   | FDR < 0.05              | 0.803                                      |
| <b>Fat</b>             | 6                                  | 8                                    | FDR < 0.05              | 0.491                                      |
| <b>Muscle</b>          | 23                                 | 63                                   | FDR < 0.05              | 0.999                                      |
| <b>Pituitary-gland</b> | 34                                 | 23                                   | FDR < 0.05              | <b>0.0001*</b>                             |
| <b>Liver</b>           | 13                                 | 32                                   | FDR < 0.1               | 0.727                                      |
| <b>Fat</b>             | 7                                  | 11                                   | FDR < 0.1               | 0.3327                                     |
| <b>Muscle</b>          | 34                                 | 129                                  | FDR < 0.1               | 1                                          |
| <b>Pituitary-gland</b> | 52                                 | 56                                   | FDR < 0.1               | <b>9.61E-06*</b>                           |
| <b>Liver</b>           | 34                                 | 95                                   | FDR < 0.2               | 0.474                                      |
| <b>Fat</b>             | 8                                  | 20                                   | FDR < 0.2               | 0.437                                      |
| <b>Muscle</b>          | 70                                 | 348                                  | FDR < 0.2               | 1                                          |
| <b>Pituitary-gland</b> | 94                                 | 130                                  | FDR < 0.2               | <b>1.83E-10*</b>                           |

(\*) Significant result with P-value < 0.05

The Fisher's exact test was employed for significance test of the male-biasness in each tissue. The hypothesis test was performed using 2x2 contingency tables composed of two factors such as Gender-biasness (Male-biased gene / Female-biased gene) and Tissue (Targeted tissue / The others). The alternative hypothesis is the odds ratio is greater than 1, which means male-biased genes of the specific tissue are significantly enriched compared to other tissues.

**Table S4. Number of significant detected DEGs in each chromosome (FDR adjusted P-value < 0.05)**

| Chr.           | Liver | Fat | Muscle | Pit. | Chr.    | Liver | Fat | Muscle | Pit. |
|----------------|-------|-----|--------|------|---------|-------|-----|--------|------|
| <b>Chr. 1</b>  | 0     | 0   | 4      | 1    | Chr. 17 | 2     | 0   | 2      | 2    |
| <b>Chr. 2</b>  | 1     | 0   | 7      | 3    | Chr. 18 | 0     | 0   | 4      | 2    |
| <b>Chr. 3</b>  | 2     | 1   | 3      | 1    | Chr. 19 | 3     | 1   | 8      | 3    |
| <b>Chr. 4</b>  | 2     | 0   | 3      | 2    | Chr. 20 | 0     | 0   | 1      | 0    |
| <b>Chr. 5</b>  | 0     | 1   | 5      | 3    | Chr. 21 | 0     | 0   | 0      | 3    |
| <b>Chr. 6</b>  | 0     | 2   | 2      | 3    | Chr. 22 | 0     | 0   | 1      | 0    |
| <b>Chr. 7</b>  | 0     | 0   | 3      | 0    | Chr. 23 | 0     | 0   | 1      | 2    |
| <b>Chr. 8</b>  | 2     | 0   | 1      | 3    | Chr. 24 | 2     | 0   | 2      | 2    |
| <b>Chr. 9</b>  | 0     | 0   | 5      | 2    | Chr. 25 | 0     | 0   | 1      | 2    |
| <b>Chr. 10</b> | 1     | 0   | 3      | 0    | Chr. 26 | 0     | 1   | 1      | 2    |
| <b>Chr. 11</b> | 0     | 0   | 4      | 3    | Chr. 27 | 0     | 0   | 1      | 0    |
| <b>Chr. 12</b> | 1     | 0   | 1      | 0    | Chr. 28 | 0     | 0   | 2      | 1    |
| <b>Chr. 13</b> | 0     | 0   | 0      | 2    | Chr. 29 | 1     | 0   | 0      | 1    |
| <b>Chr. 14</b> | 1     | 0   | 0      | 2    | Chr. X  | 0     | 1   | 5      | 3    |
| <b>Chr. 15</b> | 2     | 1   | 3      | 1    | Chr. Y  | 3     | 3   | 3      | 3    |
| <b>Chr. 16</b> | 0     | 1   | 4      | 2    | Chr. Un | 1     | 2   | 6      | 3    |



**Table S5. Top-20 most significant genes from the M2 model out of a total of 655.**

| Gene_Symbol | Chromosome | FDR adjusting P-value |
|-------------|------------|-----------------------|
| USP9Y       | chrY       | 5.47E-72              |
| DDX3Y       | chrY       | 6.56E-55              |
| ZFY         | chrY       | 8.79E-55              |
| XIST        | chrX       | 1.37E-17              |
| LOC780876   | chr6       | 3.71E-12              |
| LYSB        | chr5       | 5.71E-06              |
| GABBR1      | chr23      | 4.30E-05              |
| CYP7A1      | chr14      | 6.19E-05              |
| KDM6A       | chrX       | 9.01E-05              |
| NR2E1       | chr9       | 0.000257              |
| NRBP2       | chr14      | 0.000372              |
| COL27A1     | chr8       | 0.000424              |
| DOCK6       | chr7       | 0.000466              |
| MMP12       | chr15      | 0.000595              |
| WDR19       | chr6       | 0.000595              |
| VSIG2       | chr29      | 0.000623              |
| SRSF2       | chr19      | 0.000711              |
| RGS9        | chr19      | 0.000765              |
| GNAL        | chr24      | 0.000968              |
| AMPD1       | chr3       | 0.001046              |

**Table S6. Proportion of overlapped genes between M1 (each-tissue model) and M2 (integrated model)**

| <b>FDR cutoff</b> | <b>Liver</b> | <b>Fat</b> | <b>Muscle</b> | <b>Pituitary-gland</b> |
|-------------------|--------------|------------|---------------|------------------------|
| < 0.05            | 0.583        | 0.571      | 0.453         | 0.403                  |
| < 0.1             | 0.577        | 0.888      | 0.533         | 0.481                  |
| < 0.2             | 0.604        | 0.928      | 0.622         | 0.517                  |

**Table S7. Significant biological terms from DAVID enrichment test with DEGs from the M2 (FDR < 0.05) based on several biological databases such as gene ontology and KEGG.**

| Category      | Term                                                   | P-Value  | Count |
|---------------|--------------------------------------------------------|----------|-------|
| KEGG_PATHWAY  | Calcium signaling pathway                              | 3.70E-03 | 13    |
| KEGG_PATHWAY  | Fructose and mannose metabolism                        | 1.20E-02 | 5     |
| KEGG_PATHWAY  | Autoimmune thyroid disease                             | 3.90E-02 | 5     |
| KEGG_PATHWAY  | Circadian rhythm                                       | 4.90E-02 | 3     |
| KEGG_PATHWAY  | Glycosphingolipid biosynthesis                         | 6.50E-02 | 3     |
| KEGG_PATHWAY  | Primary immunodeficiency                               | 7.10E-02 | 4     |
| KEGG_PATHWAY  | Taste transduction                                     | 7.60E-02 | 4     |
| KEGG_PATHWAY  | Hematopoietic cell lineage                             | 8.50E-02 | 6     |
| KEGG_PATHWAY  | T cell receptor signaling pathway                      | 9.60E-02 | 7     |
| KEGG_PATHWAY  | Natural killer cell mediated cytotoxicity              | 9.60E-02 | 7     |
| KEGG_PATHWAY  | Steroid hormone biosynthesis                           | 9.90E-02 | 4     |
| GOTERM_BP_FAT | regulation of RNA metabolic process                    | 2.90E-04 | 50    |
| GOTERM_BP_FAT | transcription                                          | 4.00E-04 | 33    |
| GOTERM_BP_FAT | rhythmic process                                       | 6.90E-04 | 7     |
| GOTERM_BP_FAT | regulation of transcription, DNA-dependent             | 1.20E-03 | 47    |
| GOTERM_BP_FAT | regulation of transcription                            | 2.40E-03 | 59    |
| GOTERM_BP_FAT | leukocyte activation                                   | 3.80E-03 | 11    |
| GOTERM_BP_FAT | eye photoreceptor cell development                     | 5.50E-03 | 4     |
| GOTERM_BP_FAT | eye photoreceptor cell differentiation                 | 7.20E-03 | 4     |
| GOTERM_BP_FAT | activation of adenylate cyclase activity               | 1.10E-02 | 4     |
| GOTERM_BP_FAT | photoreceptor cell development                         | 1.10E-02 | 4     |
| GOTERM_BP_FAT | cell activation                                        | 1.10E-02 | 11    |
| GOTERM_BP_FAT | lymphocyte activation                                  | 1.20E-02 | 9     |
| GOTERM_BP_FAT | positive regulation of adenylate cyclase activity      | 1.40E-02 | 4     |
| GOTERM_BP_FAT | photoreceptor cell differentiation                     | 1.40E-02 | 4     |
| GOTERM_BP_FAT | positive regulation of cyclase activity                | 1.60E-02 | 4     |
| GOTERM_BP_FAT | positive regulation of lyase activity                  | 2.30E-02 | 4     |
| GOTERM_BP_FAT | modification-dependent macromolecule catabolic process | 2.50E-02 | 15    |
| GOTERM_BP_FAT | modification-dependent protein catabolic process       | 2.50E-02 | 15    |
| GOTERM_BP_FAT | eye morphogenesis                                      | 2.90E-02 | 5     |
| GOTERM_BP_FAT | vesicle-mediated transport                             | 3.00E-02 | 16    |
| GOTERM_BP_FAT | hemopoiesis                                            | 3.30E-02 | 9     |
| GOTERM_BP_FAT | regulation of adenylate cyclase activity               | 3.40E-02 | 4     |
| GOTERM_BP_FAT | ovulation cycle process                                | 3.40E-02 | 4     |
| GOTERM_BP_FAT | female gonad development                               | 3.40E-02 | 4     |
| GOTERM_BP_FAT | ovulation cycle                                        | 3.40E-02 | 4     |

|               |                                                                                  |          |    |
|---------------|----------------------------------------------------------------------------------|----------|----|
| GOTERM_BP_FAT | intracellular signaling cascade                                                  | 3.80E-02 | 26 |
| GOTERM_BP_FAT | female sex differentiation                                                       | 3.90E-02 | 4  |
| GOTERM_BP_FAT | development of primary female sexual characteristics                             | 3.90E-02 | 4  |
| GOTERM_BP_FAT | regulation of cellular response to stress                                        | 4.10E-02 | 5  |
| GOTERM_BP_FAT | gonad development                                                                | 4.10E-02 | 5  |
| GOTERM_BP_FAT | secretion by cell                                                                | 4.40E-02 | 8  |
| GOTERM_BP_FAT | regulation of interleukin-2 biosynthetic process                                 | 4.50E-02 | 3  |
| GOTERM_BP_FAT | proteolysis involved in cellular protein catabolic process                       | 4.70E-02 | 15 |
| GOTERM_BP_FAT | regulation of cyclase activity                                                   | 4.90E-02 | 4  |
| GOTERM_BP_FAT | cellular protein catabolic process                                               | 4.90E-02 | 15 |
| GOTERM_BP_FAT | calcium ion-dependent exocytosis                                                 | 5.30E-02 | 3  |
| GOTERM_BP_FAT | regulation of cAMP biosynthetic process                                          | 5.40E-02 | 4  |
| GOTERM_BP_FAT | development of primary sexual characteristics                                    | 5.60E-02 | 5  |
| GOTERM_BP_FAT | neuron development                                                               | 5.80E-02 | 8  |
| GOTERM_BP_FAT | hemopoietic or lymphoid organ development                                        | 5.80E-02 | 9  |
| GOTERM_BP_FAT | regulation of lyase activity                                                     | 5.90E-02 | 4  |
| GOTERM_BP_FAT | reproductive structure development                                               | 6.00E-02 | 5  |
| GOTERM_BP_FAT | eye development                                                                  | 6.30E-02 | 6  |
| GOTERM_BP_FAT | regulation of cAMP metabolic process                                             | 7.10E-02 | 4  |
| GOTERM_BP_FAT | regulation of adenylate cyclase activity involved in G-protein signaling         | 7.20E-02 | 3  |
| GOTERM_BP_FAT | cytolysis                                                                        | 7.20E-02 | 3  |
| GOTERM_BP_FAT | positive regulation of adenylate cyclase activity by G-protein signaling pathway | 7.20E-02 | 3  |
| GOTERM_BP_FAT | activation of adenylate cyclase activity by G-protein signaling pathway          | 7.20E-02 | 3  |
| GOTERM_BP_FAT | adult behavior                                                                   | 7.40E-02 | 5  |
| GOTERM_BP_FAT | cellular macromolecule catabolic process                                         | 7.80E-02 | 16 |
| GOTERM_BP_FAT | second-messenger-mediated signaling                                              | 7.90E-02 | 5  |
| GOTERM_BP_FAT | protein catabolic process                                                        | 8.10E-02 | 15 |
| GOTERM_BP_FAT | lymphocyte differentiation                                                       | 8.30E-02 | 5  |
| GOTERM_BP_FAT | regulation of cyclic nucleotide biosynthetic process                             | 8.40E-02 | 4  |
| GOTERM_BP_FAT | regulation of nucleotide biosynthetic process                                    | 8.40E-02 | 4  |
| GOTERM_BP_FAT | immune system development                                                        | 8.40E-02 | 9  |

**Table S8. Set of 14 detected clusters of biological terms derived from DAVID annotation clustering.**

|                               |                                                            |                |
|-------------------------------|------------------------------------------------------------|----------------|
| <b>Enrichment Score: 2.91</b> |                                                            | <b>P-value</b> |
| GOTERM_BP_FAT                 | transcription                                              | 4.00E-04       |
| <b>Enrichment Score: 2.48</b> |                                                            | <b>P-value</b> |
| GOTERM_BP_FAT                 | regulation of RNA metabolic process                        | 2.90E-04       |
| GOTERM_BP_FAT                 | transcription                                              | 4.00E-04       |
| GOTERM_BP_FAT                 | regulation of transcription, DNA-dependent                 | 1.20E-03       |
| GOTERM_MF_FAT                 | transcription factor activity                              | 1.60E-03       |
| GOTERM_BP_FAT                 | regulation of transcription                                | 2.40E-03       |
| GOTERM_MF_FAT                 | DNA binding                                                | 2.20E-02       |
| GOTERM_MF_FAT                 | transcription regulator activity                           | 2.70E-02       |
| GOTERM_MF_FAT                 | sequence-specific DNA binding                              | 7.20E-02       |
| <b>Enrichment Score: 2.32</b> |                                                            | <b>P-value</b> |
| GOTERM_MF_FAT                 | cation binding                                             | 1.30E-04       |
| GOTERM_MF_FAT                 | ion binding                                                | 1.90E-04       |
| GOTERM_MF_FAT                 | metal ion binding                                          | 3.20E-04       |
| GOTERM_MF_FAT                 | transition metal ion binding                               | 4.60E-03       |
| GOTERM_MF_FAT                 | zinc ion binding                                           | 1.80E-02       |
| <b>Enrichment Score: 2.01</b> |                                                            | <b>P-value</b> |
| GOTERM_MF_FAT                 | nucleotide binding                                         | 2.70E-04       |
| GOTERM_MF_FAT                 | purine nucleotide binding                                  | 3.30E-03       |
| GOTERM_MF_FAT                 | ribonucleotide binding                                     | 4.60E-03       |
| GOTERM_MF_FAT                 | purine ribonucleotide binding                              | 4.60E-03       |
| GOTERM_MF_FAT                 | purine nucleoside binding                                  | 6.50E-03       |
| GOTERM_MF_FAT                 | ATP binding                                                | 6.70E-03       |
| GOTERM_MF_FAT                 | nucleoside binding                                         | 7.20E-03       |
| GOTERM_MF_FAT                 | adenyl ribonucleotide binding                              | 7.80E-03       |
| GOTERM_MF_FAT                 | adenyl nucleotide binding                                  | 8.60E-03       |
| GOTERM_MF_FAT                 | protein kinase activity                                    | 1.90E-01       |
| GOTERM_BP_FAT                 | phosphorylation                                            | 1.90E-01       |
| <b>Enrichment Score: 1.92</b> |                                                            | <b>P-value</b> |
| GOTERM_BP_FAT                 | modification-dependent macromolecule catabolic process     | 2.50E-02       |
| GOTERM_BP_FAT                 | modification-dependent protein catabolic process           | 2.50E-02       |
| GOTERM_BP_FAT                 | proteolysis involved in cellular protein catabolic process | 4.70E-02       |
| GOTERM_BP_FAT                 | cellular protein catabolic process                         | 4.90E-02       |
| GOTERM_BP_FAT                 | cellular macromolecule catabolic process                   | 7.80E-02       |
| GOTERM_BP_FAT                 | protein catabolic process                                  | 8.10E-02       |
| GOTERM_BP_FAT                 | macromolecule catabolic process                            | 1.60E-01       |
| GOTERM_BP_FAT                 | proteolysis                                                | 3.80E-01       |

|                               |                                                      |                |
|-------------------------------|------------------------------------------------------|----------------|
| <b>Enrichment Score: 1.32</b> |                                                      | <b>P-value</b> |
| GOTERM_BP_FAT                 | RNA processing                                       | 9.00E-01       |
| <b>Enrichment Score: 1.21</b> |                                                      | <b>P-value</b> |
| GOTERM_CC_FAT                 | external side of plasma membrane                     | 4.90E-02       |
| GOTERM_CC_FAT                 | cell surface                                         | 5.60E-02       |
| KEGG_PATHWAY                  | Hematopoietic cell lineage                           | 8.50E-02       |
| <b>Enrichment Score: 1.19</b> |                                                      | <b>P-value</b> |
| GOTERM_BP_FAT                 | rhythmic process                                     | 6.90E-04       |
| GOTERM_BP_FAT                 | ovulation cycle process                              | 3.40E-02       |
| GOTERM_BP_FAT                 | ovulation cycle                                      | 3.40E-02       |
| GOTERM_BP_FAT                 | female gonad development                             | 3.40E-02       |
| GOTERM_BP_FAT                 | development of primary female sexual characteristics | 3.90E-02       |
| GOTERM_BP_FAT                 | female sex differentiation                           | 3.90E-02       |
| GOTERM_BP_FAT                 | gonad development                                    | 4.10E-02       |
| KEGG_PATHWAY                  | Circadian rhythm                                     | 4.90E-02       |
| GOTERM_BP_FAT                 | development of primary sexual characteristics        | 5.60E-02       |
| GOTERM_BP_FAT                 | reproductive structure development                   | 6.00E-02       |
| GOTERM_BP_FAT                 | sex differentiation                                  | 1.20E-01       |
| GOTERM_BP_FAT                 | reproductive developmental process                   | 2.40E-01       |
| GOTERM_MF_FAT                 | copper ion binding                                   | 4.10E-01       |
| GOTERM_BP_FAT                 | multicellular organism reproduction                  | 5.80E-01       |
| GOTERM_BP_FAT                 | reproductive process in a multicellular organism     | 5.80E-01       |
| <b>Enrichment Score: 1.17</b> |                                                      | <b>P-value</b> |
| GOTERM_BP_FAT                 | leukocyte activation                                 | 3.80E-03       |
| GOTERM_BP_FAT                 | cell activation                                      | 1.10E-02       |
| GOTERM_BP_FAT                 | lymphocyte activation                                | 1.20E-02       |
| GOTERM_BP_FAT                 | hemopoiesis                                          | 3.30E-02       |
| GOTERM_BP_FAT                 | hemopoietic or lymphoid organ development            | 5.80E-02       |
| GOTERM_BP_FAT                 | lymphocyte differentiation                           | 8.30E-02       |
| GOTERM_BP_FAT                 | immune system development                            | 8.40E-02       |
| GOTERM_BP_FAT                 | B cell activation                                    | 1.20E-01       |
| GOTERM_BP_FAT                 | T cell differentiation in the thymus                 | 1.50E-01       |
| GOTERM_BP_FAT                 | T cell activation                                    | 1.50E-01       |
| GOTERM_BP_FAT                 | leukocyte differentiation                            | 1.60E-01       |
| GOTERM_BP_FAT                 | T cell differentiation                               | 3.30E-01       |
| GOTERM_BP_FAT                 | homeostasis of number of cells                       | 6.00E-01       |
| <b>Enrichment Score: 1.13</b> |                                                      | <b>P-value</b> |
| GOTERM_BP_FAT                 | activation of adenylate cyclase activity             | 1.10E-02       |
| GOTERM_BP_FAT                 | positive regulation of adenylate cyclase activity    | 1.40E-02       |

|                               |                                                                                  |                |
|-------------------------------|----------------------------------------------------------------------------------|----------------|
| GOTERM_BP_FAT                 | positive regulation of cyclase activity                                          | 1.60E-02       |
| GOTERM_BP_FAT                 | positive regulation of lyase activity                                            | 2.30E-02       |
| GOTERM_BP_FAT                 | regulation of adenylate cyclase activity                                         | 3.40E-02       |
| GOTERM_BP_FAT                 | regulation of cyclase activity                                                   | 4.90E-02       |
| GOTERM_BP_FAT                 | regulation of cAMP biosynthetic process                                          | 5.40E-02       |
| GOTERM_BP_FAT                 | regulation of lyase activity                                                     | 5.90E-02       |
| GOTERM_BP_FAT                 | regulation of cAMP metabolic process                                             | 7.10E-02       |
| GOTERM_BP_FAT                 | positive regulation of adenylate cyclase activity by G-protein signaling pathway | 7.20E-02       |
| GOTERM_BP_FAT                 | activation of adenylate cyclase activity by G-protein signaling pathway          | 7.20E-02       |
| GOTERM_BP_FAT                 | regulation of adenylate cyclase activity involved in G-protein signaling         | 7.20E-02       |
| GOTERM_BP_FAT                 | second-messenger-mediated signaling                                              | 7.90E-02       |
| GOTERM_BP_FAT                 | regulation of cyclic nucleotide biosynthetic process                             | 8.40E-02       |
| GOTERM_BP_FAT                 | regulation of nucleotide biosynthetic process                                    | 8.40E-02       |
| GOTERM_BP_FAT                 | regulation of cyclic nucleotide metabolic process                                | 1.10E-01       |
| GOTERM_BP_FAT                 | regulation of nucleotide metabolic process                                       | 1.20E-01       |
| GOTERM_BP_FAT                 | positive regulation of catalytic activity                                        | 1.40E-01       |
| GOTERM_BP_FAT                 | G-protein signaling, coupled to cAMP nucleotide second messenger                 | 1.60E-01       |
| GOTERM_BP_FAT                 | G-protein signaling, coupled to cyclic nucleotide second messenger               | 1.60E-01       |
| GOTERM_BP_FAT                 | cAMP-mediated signaling                                                          | 1.80E-01       |
| GOTERM_BP_FAT                 | cyclic-nucleotide-mediated signaling                                             | 1.90E-01       |
| GOTERM_BP_FAT                 | positive regulation of molecular function                                        | 2.60E-01       |
| GOTERM_BP_FAT                 | positive regulation of hydrolase activity                                        | 4.90E-01       |
| <b>Enrichment Score: 1.12</b> |                                                                                  | <b>P-value</b> |
| GOTERM_BP_FAT                 | secretion by cell                                                                | 4.40E-02       |
| GOTERM_BP_FAT                 | calcium ion-dependent exocytosis                                                 | 5.30E-02       |
| GOTERM_BP_FAT                 | secretion                                                                        | 1.20E-01       |
| GOTERM_BP_FAT                 | exocytosis                                                                       | 1.20E-01       |
| <b>Enrichment Score: 1.1</b>  |                                                                                  | <b>P-value</b> |
| GOTERM_MF_FAT                 | motor activity                                                                   | 1.10E-02       |
| GOTERM_MF_FAT                 | microtubule motor activity                                                       | 9.80E-02       |
| GOTERM_BP_FAT                 | microtubule-based process                                                        | 1.80E-01       |
| GOTERM_BP_FAT                 | microtubule-based movement                                                       | 2.10E-01       |
| <b>Enrichment Score: 1.07</b> |                                                                                  | <b>P-value</b> |
| GOTERM_BP_FAT                 | eye photoreceptor cell development                                               | 5.50E-03       |
| GOTERM_BP_FAT                 | eye photoreceptor cell differentiation                                           | 7.20E-03       |
| GOTERM_CC_FAT                 | cilium part                                                                      | 7.50E-03       |
| GOTERM_BP_FAT                 | photoreceptor cell development                                                   | 1.10E-02       |
| GOTERM_BP_FAT                 | photoreceptor cell differentiation                                               | 1.40E-02       |
| GOTERM_BP_FAT                 | eye morphogenesis                                                                | 2.90E-02       |

|                               |                                         |                |
|-------------------------------|-----------------------------------------|----------------|
| GOTERM_BP_FAT                 | neuron development                      | 5.80E-02       |
| GOTERM_BP_FAT                 | eye development                         | 6.30E-02       |
| GOTERM_CC_FAT                 | nonmotile primary cilium                | 1.20E-01       |
| GOTERM_BP_FAT                 | neuron differentiation                  | 1.30E-01       |
| GOTERM_CC_FAT                 | cell projection                         | 1.60E-01       |
| GOTERM_CC_FAT                 | cilium                                  | 2.00E-01       |
| GOTERM_BP_FAT                 | sensory perception of light stimulus    | 2.10E-01       |
| GOTERM_BP_FAT                 | visual perception                       | 2.10E-01       |
| GOTERM_BP_FAT                 | sensory organ development               | 2.30E-01       |
| GOTERM_CC_FAT                 | cell projection part                    | 2.50E-01       |
| GOTERM_BP_FAT                 | sensory perception of chemical stimulus | 3.00E-01       |
| GOTERM_BP_FAT                 | sensory perception                      | 3.20E-01       |
| GOTERM_BP_FAT                 | cognition                               | 3.60E-01       |
| GOTERM_BP_FAT                 | neurological system process             | 4.00E-01       |
| GOTERM_BP_FAT                 | camera-type eye development             | 5.30E-01       |
| <b>Enrichment Score: 1.04</b> |                                         | <b>P-value</b> |
| KEGG_PATHWAY                  | Fructose and mannose metabolism         | 1.20E-02       |
| GOTERM_MF_FAT                 | phosphofructokinase activity            | 1.60E-02       |
| GOTERM_MF_FAT                 | carbohydrate kinase activity            | 1.00E-01       |
| GOTERM_BP_FAT                 | hexose metabolic process                | 5.50E-01       |
| GOTERM_BP_FAT                 | monosaccharide metabolic process        | 6.30E-01       |



**Table S9. Primer sequences used in real-time PCR analysis of cattle tissues**

| Gene name                                                                                             | Symbol   | GenBank ID   | 5' → 3' | Sequences               | Product size, bp |
|-------------------------------------------------------------------------------------------------------|----------|--------------|---------|-------------------------|------------------|
| Adrenomedullin                                                                                        | ADM      | BC123826     | Forward | TTTCACGGACAAGGACAAGG    | 118              |
|                                                                                                       |          |              | Reverse | CTGTAATAGAGTCCGACCCAAG  |                  |
| Adenosine monophosphate deaminase 1                                                                   | AMPD1    | NM_001100349 | Forward | TCTATCCAGTCTTTACCCCTCC  | 105              |
|                                                                                                       |          |              | Reverse | CCACACCGTCCTTCATTTTG    |                  |
| Apolipoprotein D                                                                                      | APOD     | NM_001076301 | Forward | GCCACCGACTATGAGAACTAC   | 124              |
|                                                                                                       |          |              | Reverse | GATAGGTCAGTGTTCCTGGAGG  |                  |
| Rho guanine nucleotide exchange factor (GEF) 19                                                       | ARHGEF19 | NM_001206270 | Forward | TTCTCATCCTGCCGTTTC      | 95               |
|                                                                                                       |          |              | Reverse | ATGTCTTCATCTTCAGAGCCC   |                  |
| Cation channel, sperm associated 2                                                                    | CATSPER2 | NM_001192477 | Forward | AGAACGGATTACACATGCCC    | 109              |
|                                                                                                       |          |              | Reverse | GAAGATAGGACGCTCAAGGAC   |                  |
| Glycoprotein hormones, alpha polypeptide                                                              | CGA      | NM_173901    | Forward | TCCAATCTATCAGTGCATGGG   | 136              |
|                                                                                                       |          |              | Reverse | GGCCTTGGTAAATGCTTTGG    |                  |
| Collagen, type XXVII, alpha 1                                                                         | COL27A1  | NM_001206680 | Forward | CGGGTCCAGATGAATTCCTG    | 73               |
|                                                                                                       |          |              | Reverse | TGTTAAGGCAGTGGATGGTG    |                  |
| Cut-like homeobox 2                                                                                   | CUX2     | NM_001192597 | Forward | CAGTATCACCCCAAGAATCCG   | 97               |
|                                                                                                       |          |              | Reverse | CTTCTGTGACTCGATCTCCTTC  |                  |
| Cytochrome P450, family 7, subfamily A, polypeptide 1                                                 | CYP7A1   | NM_001205677 | Forward | CCAGAAGTTCAGAGAAAGAGACC | 138              |
|                                                                                                       |          |              | Reverse | GCTGGAATGGTGTGTTGCTTG   |                  |
| D site of albumin promoter (albumin D-box) binding protein                                            | DBP      | BC108134     | Forward | GATACGGTGGAGGTGTTGATG   | 89               |
|                                                                                                       |          |              | Reverse | CGAGGGTCAAAGGTCTCATG    |                  |
| DEAD (Asp-Glu-Ala-Asp) box polypeptide 3, Y-linked                                                    | DDX3Y    | NM_001172595 | Forward | CCAGTTACTTCAGTGATCGAGG  | 127              |
|                                                                                                       |          |              | Reverse | TGTCCACTACGCTCAAATCTG   |                  |
| Dedicator of cytokinesis 6                                                                            | DOCK6    | NM_001192166 | Forward | CATCAACAGCCTCACATTC AAG | 135              |
|                                                                                                       |          |              | Reverse | TTCTCCTGGTTCCCAAATGG    |                  |
| Epiphycan                                                                                             | EPYC     | BTU77127     | Forward | ACCACATCCCTCTACCACTC    | 136              |
|                                                                                                       |          |              | Reverse | CGAATATCCTCTAGTGCCTTACG |                  |
| Formiminotransferase cyclodeaminase                                                                   | FTCD     | NM_001205399 | Forward | CTGGCATTCAACATCAACCTG   | 139              |
|                                                                                                       |          |              | Reverse | TCTCATCCAGGTACCAGCC     |                  |
| Gamma-aminobutyric acid (GABA) B receptor, 1                                                          | GABBR1   | BC146241     | Forward | GACCATTGAGACTTTTGCCAAG  | 133              |
|                                                                                                       |          |              | Reverse | CAGTAGCCCCTTGTAACCATAG  |                  |
| Guanine nucleotide binding protein (G protein), alpha activating activity polypeptide, olfactory type | GNAL     | NM_001102554 | Forward | AGGGCGTCGATGAAAAGG      | 136              |
|                                                                                                       |          |              | Reverse | ACGATAGTGCTTTTCCAGAC    |                  |
| Homeobox D4                                                                                           | HOXD4    | NM_001101087 | Forward | ATTCCGTGAACCCCAACTAC    | 139              |
|                                                                                                       |          |              | Reverse | TGAGCGATTTCAATCCGACG    |                  |
| HtrA serine peptidase 1                                                                               | HTRA1    | NM_001282082 | Forward | CCAGCAAAGCCAAAGAGTTG    | 124              |
|                                                                                                       |          |              | Reverse | ACATCGTTTTCTTGAGCCC     |                  |
| Insulin-like growth factor binding protein 1                                                          | IGFBP1   | NM_174554    | Forward | AGTAATTATGAGAGCTTGAGGGC | 128              |
|                                                                                                       |          |              | Reverse | AGTTTGTCTCCTGCCTTCTG    |                  |
| Malic enzyme 2, NAD(+)-dependent, mitochondrial                                                       | ME2      | BC123669     | Forward | CCTGGTGTAATCAAAGCAATGG  | 119              |
|                                                                                                       |          |              | Reverse | CTTCCCTCTGTAAGCGTGTATG  |                  |
| Myosin, heavy chain 1, skeletal muscle, adult                                                         | MYH1     | NM_174117    | Forward | CTGGAAGGAGAAGTTGAGAGTG  | 137              |
|                                                                                                       |          |              | Reverse | AAATCCTGGAGCCTGAGAATG   |                  |
| Nuclear receptor binding protein 2                                                                    | NRBP2    | BC123443     | Forward | AGTTCATCCTCTCCTGCCTAG   | 135              |
|                                                                                                       |          |              | Reverse | GGTACTGGTGCTGGATGAAG    |                  |
| Protein phosphatase 1, regulatory subunit 3A                                                          | PPP1R3A  | NM_001205440 | Forward | AATAAGTGTGGAAGGGATGGG   | 97               |

|                                                                     |         |              |         |                        |     |
|---------------------------------------------------------------------|---------|--------------|---------|------------------------|-----|
| RAB3C, member RAS oncogene family                                   | RAB3C   | BC112795     | Reverse | CGTATCTGCTCTGATTGACTGG |     |
|                                                                     |         |              | Forward | TTTGAGCGTCTCGTGGATATC  | 98  |
| RNA binding motif protein 38                                        | RBM38   | NM_001206023 | Reverse | TCCTTGAGTCTTGTGTTCTGC  |     |
|                                                                     |         |              | Forward | ACGTGAACTTGGCCTATCTG   | 137 |
|                                                                     |         |              | Reverse | GATGGCTTGTGGGTAGATGTAG |     |
| Regulator of G-protein signaling 2, 24kDa                           | RGS2    | BC120026     | Forward | ACCCAGAACCCAGAAACAAG   | 129 |
|                                                                     |         |              | Reverse | ATTGAGGCATGGGATACTGTC  |     |
| Regulator of G-protein signaling 7                                  | RGS7    | NM_174169    | Forward | CAGACTATGCGGTTTACCTCTG | 126 |
|                                                                     |         |              | Reverse | AAATGAACTCCCACTTCCGG   |     |
| Regulator of G-protein signaling 9                                  | RGS9    | NM_174170    | Forward | ATGAAGACCAGAAACAGACCG  | 138 |
|                                                                     |         |              | Reverse | CATTGGATGAAAACCTGCTCCG |     |
| Sodium channel, voltage gated, type VIII, alpha subunit             | SCN8A   | NM_001193102 | Forward | CTCATCGTGGCTGTCTCTTTAG | 137 |
|                                                                     |         |              | Reverse | ACCCTCATCCCTTCAAATCG   |     |
| Sodium channel, voltage-gated, type IX, alpha subunit               | SCN9A   | NM_001110787 | Forward | AAAGAGGGACAAAGTGACTACG | 137 |
|                                                                     |         |              | Reverse | AAGATGTTCCAGCCTACAGTG  |     |
| Solute carrier family 17 (sodium phosphate), member 3               | SLC17A3 | BC118404     | Forward | TGGAAGAGTAGGAACAAAGCG  | 128 |
|                                                                     |         |              | Reverse | TGCCCTGAAGTATTCGAGTTG  |     |
| Solute carrier family 6 (neutral amino acid transporter), member 15 | SLC6A15 | NM_181023    | Forward | CAGAAGCGATGACACATTTCC  | 76  |
|                                                                     |         |              | Reverse | AGCCCTAGATTTACCAGCATG  |     |
| Syntaxin binding protein 5-like                                     | STXBP5L | NM_001206103 | Forward | ACCCAGAACCCAGAAACAAG   | 129 |
|                                                                     |         |              | Reverse | ATTGAGGCATGGGATACTGTC  |     |
| Transducin (beta)-like 1X-linked                                    | TBL1X   | NM_001145232 | Forward | AGTCCGAGGTGTTTCATTTGTG | 108 |
|                                                                     |         |              | Reverse | CCCCGTTGCTGTTTTTCATTC  |     |
| Transmembrane protein 59-like                                       | TMEM59L | BC120018     | Forward | AGCACCTTAAGTTCCAGCC    | 135 |
|                                                                     |         |              | Reverse | TCAGGTCCAGTTTCAGCTTG   |     |
| Troponin C type 1 (slow)                                            | TNNC1   | NM_001034351 | Forward | TTTCAGACCTCTCCGCATG    | 136 |
|                                                                     |         |              | Reverse | TTGTCACCGTCCTTCATGAG   |     |
| Troponin T type 3 (skeletal, fast)                                  | TNNT3   | NM_001001441 | Forward | GGACAAGCTCAGGGACAAG    | 110 |
|                                                                     |         |              | Reverse | TGGTGATATCGTATTCTGGCG  |     |
| Uncoupling protein 3 (mitochondrial, proton carrier)                | UCP3    | NM_174210    | Forward | CGACTGTATGCTGAAGATGGTG | 128 |
|                                                                     |         |              | Reverse | CCCGTTTCATCTGCTCGTAG   |     |
| Ubiquitin specific peptidase 9, Y-linked                            | USP9Y   | NM_001145509 | Forward | ATTCTACTCCGTCACAGCAAG  | 123 |
|                                                                     |         |              | Reverse | AAATACACCCCTCACTTCAGC  |     |
| Zinc finger protein 280B                                            | ZNF280B | BC111316     | Forward | TTTGAACCTTGAGAGGCTGAG  | 88  |
|                                                                     |         |              | Reverse | CTGGAAGGGCGTAGGAAAC    |     |

<sup>1</sup>Housekeeping gene.

**Table S10. Primer sequences used in real-time PCR analysis of rat tissues**

| Gene name                                                                                             | Symbol   | GenBank ID   | 5' → 3' | Sequences                | Product size, bp |
|-------------------------------------------------------------------------------------------------------|----------|--------------|---------|--------------------------|------------------|
| Adrenomedullin                                                                                        | ADM      | NM_012715    | Forward | TGATGTTATTGGGTTTCGCTCG   | 124              |
|                                                                                                       |          |              | Reverse | GACGCTTGTAGTTCCTCTTC     |                  |
| Adenosine monophosphate deaminase 1                                                                   | AMPD1    | NM_138876    | Forward | CCCTACCCTTACCCAAATCTG    | 137              |
|                                                                                                       |          |              | Reverse | ATCTGATGGACCTGGAACCTG    |                  |
| Apolipoprotein D                                                                                      | APOD     | NM_012777    | Forward | CTATGCCCTCGTGTATTCCTG    | 107              |
|                                                                                                       |          |              | Reverse | GGTAGGTTATTGTTTCTGGAGGG  |                  |
| Rho guanine nucleotide exchange factor (GEF) 19                                                       | ARHGEF19 | NM_001108692 | Forward | CACCCGTCGATCTAAATGAGG    | 90               |
|                                                                                                       |          |              | Reverse | TGGCACTGTTGGTATCTTGAG    |                  |
| Cation channel, sperm associated 2                                                                    | CATSPER2 | BC079422     | Forward | CTCCCAACTCTTCATCCCATG    | 114              |
|                                                                                                       |          |              | Reverse | GATCCATATCCATTAGCCAGG    |                  |
| Glycoprotein hormones, alpha polypeptide                                                              | CGA      | NM_053918    | Forward | TGTATGGGCTGTTGCTTCTC     | 127              |
|                                                                                                       |          |              | Reverse | CTGTGGCCTTAGTAAATGATTTGG |                  |
| Collagen, type XXVII, alpha 1                                                                         | COL27A1  | NM_198747    | Forward | AGTTTGCTGTTAGTCGGGTC     | 77               |
|                                                                                                       |          |              | Reverse | GTGGATTGTGATGTGCTGTG     |                  |
| Cut-like homeobox 2                                                                                   | CUX2     | NM_001271380 | Forward | AGAGATTGAGACCAAAAGCC     | 128              |
|                                                                                                       |          |              | Reverse | CATCCACCTCTAAACCTCTTC    |                  |
| Cytochrome P450, family 7, subfamily A, polypeptide 1                                                 | CYP7A1   | NM_012942    | Forward | TGAATATCCGCACAGCTAAGG    | 140              |
|                                                                                                       |          |              | Reverse | GAAAGTCAAAGGGTCTGGGTAG   |                  |
| D site of albumin promoter (albumin D-box) binding protein                                            | DBP      | BC087668     | Forward | CGAGGAACAGAAGGATGAGAAG   | 137              |
|                                                                                                       |          |              | Reverse | GGGCGTTTTCTTCTCCAG       |                  |
| DEAD (Asp-Glu-Ala-Asp) box polypeptide 3, Y-linked                                                    | DDX3Y    | FJ775727     | Forward | AACAGATTCGGGACTTAGAACG   | 132              |
|                                                                                                       |          |              | Reverse | TCCTGTCAGCTTCATCCAAC     |                  |
| Dedicator of cytokinesis 6                                                                            | DOCK6    | NM_001108997 | Forward | AGAGGATGGAAAGTTGGACG     | 129              |
|                                                                                                       |          |              | Reverse | CGCTGTGTCTCTGTAGTGATG    |                  |
| Epiphycan                                                                                             | EPYC     | BC161903     | Forward | GTAAGGCGCTAGAGGATATTCG   | 92               |
|                                                                                                       |          |              | Reverse | AATGGGCAAACGAGGTAGAC     |                  |
| Formiminotransferase cyclodeaminase                                                                   | FTCD     | AF079233     | Forward | AATGTGTCCCAACTCTCTCAG    | 107              |
|                                                                                                       |          |              | Reverse | TCCAGCATCAACGTCCAAC      |                  |
| Gamma-aminobutyric acid (GABA) B receptor, 1                                                          | GABBR1   | NM_031028    | Forward | GCCATCGTGTCTCTCTCTAC     | 114              |
|                                                                                                       |          |              | Reverse | TCCTGTTTTCATGGTGTCTCTG   |                  |
| Guanine nucleotide binding protein (G protein), alpha activating activity polypeptide, olfactory type | GNAL     | NM_001191836 | Forward | CATCAAGAGCATAGCCCTATC    | 122              |
|                                                                                                       |          |              | Reverse | GCTGGTACTCGTTGGATCTC     |                  |
| Homeobox D4                                                                                           | HOXD4    | NM_001105885 | Forward | TGAAATCGCTCACACCCTG      | 136              |
|                                                                                                       |          |              | Reverse | GGAGCAGGAAGATGAGGAAG     |                  |
| HtrA serine peptidase 1                                                                               | HTRA1    | NM_031721    | Forward | TCTCCTCGCAATTCATCC       | 86               |
|                                                                                                       |          |              | Reverse | CTTGGTGACAGTTTTCCCTTTG   |                  |
| Insulin-like growth factor binding protein 1                                                          | IGFBP1   | NM_013144    | Forward | GAGCCTGTGTACTAGAACCTG    | 129              |
|                                                                                                       |          |              | Reverse | GCTGTTCTCTGTCTCTCTCTG    |                  |
| Malic enzyme 2, NAD(+)-dependent, mitochondrial                                                       | ME2      | NM_001107376 | Forward | ACTCCTTGCACTTTGACCTG     | 96               |
|                                                                                                       |          |              | Reverse | TGTAACGCCATCCCCTTG       |                  |
| Myosin, heavy chain 1, skeletal muscle, adult                                                         | MYH1     | NM_001135158 | Forward | CAATGAGACTAAGACGCCTGG    | 140              |
|                                                                                                       |          |              | Reverse | ATCTCTGCTTGAAGTCTGCG     |                  |
| Nuclear receptor binding protein 2                                                                    | NRBP2    | NM_001135007 | Forward | TTTCATCCAGCACCAGTACC     | 139              |
|                                                                                                       |          |              | Reverse | GAAGGAAACCTCTGAGTACCG    |                  |
| Protein phosphatase 1, regulatory subunit 3A                                                          | PPP1R3A  | NM_001109222 | Forward | TAGACGATAATGCCAACCAG     | 72               |
|                                                                                                       |          |              | Reverse |                          |                  |

|                                                                     |         |              |         |                          |     |
|---------------------------------------------------------------------|---------|--------------|---------|--------------------------|-----|
| RAB3C, member RAS oncogene family                                   | RAB3C   | NM_133536    | Reverse | CACCTGCCCTTAGTTGATCAG    |     |
|                                                                     |         |              | Forward | TCCTTCACGTCTGCCTTTG      | 126 |
| RNA binding motif protein 38                                        | RBM38   | NM_001108965 | Reverse | GATGGTCCTGTATCTTTCCTGG   |     |
|                                                                     |         |              | Forward | TGACTCCCCACTACATCTACC    | 102 |
| Regulator of G-protein signaling 2, 24kDa                           | RGS2    | AY043246     | Reverse | GTGTATACTCAAGGTAGGGCG    |     |
|                                                                     |         |              | Forward | GTACCCATGACAAGAGCG       | 109 |
| Regulator of G-protein signaling 7                                  | RGS7    | NM_019343    | Reverse | GCAAGAAATAGCTCAAACGGG    |     |
|                                                                     |         |              | Forward | CATCCGAAGTCACAGTCCC      | 78  |
| Regulator of G-protein signaling 9                                  | RGS9    | AF038006     | Reverse | ATCTGTCCGGTGCAACTCATC    |     |
|                                                                     |         |              | Forward | CTGTGAGGATCTGAAGTATGGG   | 110 |
| Sodium channel, voltage gated, type VIII, alpha subunit             | SCN8A   | NM_019266    | Reverse | TGCCGCTATGTTGATCCATC     |     |
|                                                                     |         |              | Forward | TGTCTTGGTCATCTTCGTGG     | 87  |
| Sodium channel, voltage-gated, type IX, alpha subunit               | SCN9A   | NM_133289    | Reverse | GCCTGGTTCTGTTCCCTATAAG   |     |
|                                                                     |         |              | Forward | GGGTCACGATTTCCCTACATCTC  | 81  |
| Solute carrier family 17 (sodium phosphate), member 3               | SLC17A3 | BC078710     | Reverse | CCATCGCACATTTCCACTAAC    |     |
|                                                                     |         |              | Forward | GTATAACTGGAGTCCCTCAAACCC | 133 |
| Solute carrier family 6 (neutral amino acid transporter), member 15 | SLC6A15 | NM_172321    | Reverse | CAACAGAGCAATTCCAACCAC    |     |
|                                                                     |         |              | Forward | GTGCTGGCTATACTTCCTGTC    | 127 |
| Syntaxin binding protein 5-like                                     | STXBP5L | NM_001271250 | Reverse | AGTTCACGGGTTCTTTTCAGG    |     |
|                                                                     |         |              | Forward | CTCATCTCCGAGTGTTCAG      | 114 |
| Transducin (beta)-like 1X-linked                                    | TBL1X   | NM_001106964 | Reverse | TGTTCTCGTTCCAATAGCCAG    |     |
|                                                                     |         |              | Forward | GCTGCCCTAATCTCCATTCTT    | 83  |
| Transmembrane protein 59-like                                       | TMEM59L | NM_001271055 | Reverse | TCAAATACCGTGCCATCCTC     |     |
|                                                                     |         |              | Forward | CTGAGTCCCCGAATAACAAGG    | 116 |
| Troponin C type 1 (slow)                                            | TNNC1   | NM_001034105 | Reverse | TTCTGTCTCTGTGGCATTGG     |     |
|                                                                     |         |              | Forward | GATCTCTTCCGCATGTTTGAC    | 136 |
| Troponin T type 3 (skeletal, fast)                                  | TNNT3   | DQ273678     | Reverse | TGTTCTTGTCACCGTCCTTC     |     |
|                                                                     |         |              | Forward | GAGGAACAGTACGAAGAGGAAG   | 116 |
| Uncoupling protein 3 (mitochondrial, proton carrier)                | UCP3    | BC072546     | Reverse | TTAGGAGCAGTAAGTTTGGGTC   |     |
|                                                                     |         |              | Forward | GCCCAACATCACAAGAAACG     | 125 |
| Ubiquitin specific peptidase 9, Y-linked                            | USP9Y   | JF827152     | Reverse | AGGCAGAGACAAAGTGACAG     |     |
|                                                                     |         |              | Forward | AAAAGTGGACCTGGGCTG       | 87  |
| Zinc finger protein 280B                                            | ZNF280B | NM_001106384 | Reverse | AGTTGCTGTAAGTGATGAGG     |     |
|                                                                     |         |              | Forward | CTCCCAAGAACCCATCCAAG     | 85  |
|                                                                     |         |              | Reverse | CTCCTTTACATTCTCCACCCC    |     |

---

<sup>1</sup>Housekeeping gene.

**Table S11. The significant gene set from DAVID enrichment test with DEGs from fat tissue (FDR < 0.2) and several gene-set databases such as gene ontology and KEGG.**

| Category      | Term                             | P-value  | Benjamini |
|---------------|----------------------------------|----------|-----------|
| GOTERM_BP_FAT | acrosome reaction                | 6.80E-03 | 6.10E-01  |
| GOTERM_BP_FAT | calcium ion-dependent exocytosis | 1.90E-02 | 7.20E-01  |
| GOTERM_BP_FAT | single fertilization             | 4.50E-02 | 8.80E-01  |
| GOTERM_BP_FAT | fertilization                    | 5.70E-02 | 8.60E-01  |
| GOTERM_BP_FAT | exocytosis                       | 9.00E-02 | 9.20E-01  |
| GOTERM_BP_FAT | reproductive cellular process    | 9.60E-02 | 9.00E-01  |
| GOTERM_BP_FAT | regulation of membrane potential | 9.60E-02 | 9.00E-01  |
| GOTERM_CC_FAT | integral to plasma membrane      | 6.40E-03 | 2.40E-01  |
| GOTERM_CC_FAT | intrinsic to plasma membrane     | 7.20E-03 | 1.40E-01  |
| GOTERM_CC_FAT | plasma membrane part             | 4.80E-02 | 5.00E-01  |
| GOTERM_CC_FAT | plasma membrane                  | 7.40E-02 | 5.60E-01  |

**Table S12. The significant gene set from DAVID enrichment test with DEGs from liver tissue (FDR < 0.2) and several gene-set databases such as gene ontology and KEGG.**

| Category      | Term                                                | P-value  | Benjamini |
|---------------|-----------------------------------------------------|----------|-----------|
| KEGG_PATHWAY  | Sulfur metabolism                                   | 6.70E-02 | 9.80E-01  |
| KEGG_PATHWAY  | Hypertrophic cardiomyopathy (HCM)                   | 8.70E-02 | 9.30E-01  |
| KEGG_PATHWAY  | Dilated cardiomyopathy                              | 9.80E-02 | 8.60E-01  |
| GOTERM_BP_FAT | defense response to bacterium                       | 8.00E-03 | 1.00E+00  |
| GOTERM_BP_FAT | negative regulation of catalytic activity           | 1.90E-02 | 1.00E+00  |
| GOTERM_BP_FAT | detection of external stimulus                      | 2.00E-02 | 9.90E-01  |
| GOTERM_BP_FAT | regulation of transcription, DNA-dependent          | 2.20E-02 | 9.80E-01  |
| GOTERM_BP_FAT | phototransduction, visible light                    | 2.20E-02 | 9.50E-01  |
| GOTERM_BP_FAT | regulation of RNA metabolic process                 | 2.50E-02 | 9.40E-01  |
| GOTERM_BP_FAT | defense response                                    | 2.60E-02 | 9.10E-01  |
| GOTERM_BP_FAT | response to bacterium                               | 2.80E-02 | 9.10E-01  |
| GOTERM_BP_FAT | negative regulation of growth                       | 3.10E-02 | 9.00E-01  |
| GOTERM_BP_FAT | negative regulation of molecular function           | 3.40E-02 | 9.00E-01  |
| GOTERM_BP_FAT | detection of stimulus                               | 3.60E-02 | 8.90E-01  |
| GOTERM_BP_FAT | ion transport                                       | 3.70E-02 | 8.70E-01  |
| GOTERM_BP_FAT | detection of visible light                          | 4.40E-02 | 9.00E-01  |
| GOTERM_BP_FAT | second-messenger-mediated signaling                 | 4.80E-02 | 9.00E-01  |
| GOTERM_BP_FAT | cation transport                                    | 5.10E-02 | 9.00E-01  |
| GOTERM_BP_FAT | phosphate metabolic process                         | 5.10E-02 | 8.90E-01  |
| GOTERM_BP_FAT | phosphorus metabolic process                        | 5.10E-02 | 8.90E-01  |
| GOTERM_BP_FAT | regulation of cell cycle                            | 5.40E-02 | 8.80E-01  |
| GOTERM_BP_FAT | transcription                                       | 7.50E-02 | 9.40E-01  |
| GOTERM_BP_FAT | sensory perception                                  | 7.90E-02 | 9.40E-01  |
| GOTERM_BP_FAT | regulation of growth                                | 8.10E-02 | 9.40E-01  |
| GOTERM_BP_FAT | regulation of transcription                         | 9.10E-02 | 9.50E-01  |
| GOTERM_BP_FAT | phosphorylation                                     | 9.50E-02 | 9.50E-01  |
| GOTERM_MF_FAT | sequence-specific DNA binding                       | 4.30E-02 | 1.00E+00  |
| GOTERM_MF_FAT | inorganic cation transmembrane transporter activity | 5.50E-02 | 1.00E+00  |
| GOTERM_MF_FAT | transcription factor activity                       | 7.50E-02 | 1.00E+00  |

**Table S13. The significant gene set from DAVID enrichment test with DEGs from muscle tissue (FDR < 0.2) and several gene-set databases such as gene ontology and KEGG.**

| Category      | Term                                             | P-value  | Benjamini |
|---------------|--------------------------------------------------|----------|-----------|
| KEGG_PATHWAY  | Complement and coagulation cascades              | 2.10E-05 | 2.60E-03  |
| KEGG_PATHWAY  | Calcium signaling pathway                        | 5.50E-04 | 3.30E-02  |
| KEGG_PATHWAY  | Regulation of actin cytoskeleton                 | 1.60E-02 | 4.80E-01  |
| KEGG_PATHWAY  | Chemokine signaling pathway                      | 2.00E-02 | 4.50E-01  |
| KEGG_PATHWAY  | Gap junction                                     | 2.20E-02 | 4.10E-01  |
| KEGG_PATHWAY  | Cell adhesion molecules (CAMs)                   | 2.60E-02 | 4.20E-01  |
| KEGG_PATHWAY  | Leukocyte transendothelial migration             | 3.50E-02 | 4.60E-01  |
| KEGG_PATHWAY  | Intestinal immune network for IgA production     | 4.00E-02 | 4.70E-01  |
| KEGG_PATHWAY  | Dilated cardiomyopathy                           | 6.20E-02 | 5.80E-01  |
| KEGG_PATHWAY  | Hematopoietic cell lineage                       | 6.40E-02 | 5.60E-01  |
| KEGG_PATHWAY  | ABC transporters                                 | 8.70E-02 | 6.40E-01  |
| KEGG_PATHWAY  | Fc gamma R-mediated phagocytosis                 | 8.90E-02 | 6.10E-01  |
| GOTERM_BP_FAT | immune response                                  | 2.10E-06 | 3.00E-03  |
| GOTERM_BP_FAT | biological adhesion                              | 1.40E-04 | 9.20E-02  |
| GOTERM_BP_FAT | cell adhesion                                    | 1.40E-04 | 9.20E-02  |
| GOTERM_BP_FAT | endocytosis                                      | 9.20E-04 | 3.50E-01  |
| GOTERM_BP_FAT | membrane invagination                            | 9.20E-04 | 3.50E-01  |
| GOTERM_BP_FAT | vesicle-mediated transport                       | 9.70E-04 | 2.80E-01  |
| GOTERM_BP_FAT | secretion                                        | 1.10E-03 | 2.50E-01  |
| GOTERM_BP_FAT | response to wounding                             | 2.00E-03 | 3.80E-01  |
| GOTERM_BP_FAT | positive regulation of immune system process     | 2.30E-03 | 3.70E-01  |
| GOTERM_BP_FAT | positive regulation of response to stimulus      | 2.90E-03 | 3.90E-01  |
| GOTERM_BP_FAT | positive regulation of immune response           | 3.80E-03 | 4.40E-01  |
| GOTERM_BP_FAT | innate immune response                           | 4.90E-03 | 5.00E-01  |
| GOTERM_BP_FAT | inflammatory response                            | 5.70E-03 | 5.10E-01  |
| GOTERM_BP_FAT | spinal cord motor neuron differentiation         | 6.40E-03 | 5.20E-01  |
| GOTERM_BP_FAT | membrane organization                            | 7.20E-03 | 5.30E-01  |
| GOTERM_BP_FAT | rhythmic process                                 | 9.10E-03 | 6.00E-01  |
| GOTERM_BP_FAT | ventral spinal cord development                  | 9.50E-03 | 5.80E-01  |
| GOTERM_BP_FAT | immune effector process                          | 9.60E-03 | 5.70E-01  |
| GOTERM_BP_FAT | enzyme linked receptor protein signaling pathway | 9.90E-03 | 5.60E-01  |
| GOTERM_BP_FAT | secretion by cell                                | 1.10E-02 | 5.80E-01  |
| GOTERM_BP_FAT | extracellular structure organization             | 1.20E-02 | 5.80E-01  |
| GOTERM_BP_FAT | blood vessel development                         | 1.20E-02 | 5.60E-01  |
| GOTERM_BP_FAT | defense response                                 | 1.40E-02 | 5.90E-01  |
| GOTERM_BP_FAT | vasculature development                          | 1.40E-02 | 5.80E-01  |

|               |                                                                  |          |          |
|---------------|------------------------------------------------------------------|----------|----------|
| GOTERM_BP_FAT | exocytosis                                                       | 1.40E-02 | 5.70E-01 |
| GOTERM_BP_FAT | neuron development                                               | 1.50E-02 | 5.90E-01 |
| GOTERM_BP_FAT | extracellular matrix organization                                | 1.60E-02 | 5.90E-01 |
| GOTERM_BP_FAT | positive regulation of lymphocyte activation                     | 1.80E-02 | 6.30E-01 |
| GOTERM_BP_FAT | phagocytosis                                                     | 2.10E-02 | 6.60E-01 |
| GOTERM_BP_FAT | cell differentiation in spinal cord                              | 2.20E-02 | 6.60E-01 |
| GOTERM_BP_FAT | organic acid transport                                           | 2.20E-02 | 6.60E-01 |
| GOTERM_BP_FAT | carboxylic acid transport                                        | 2.20E-02 | 6.60E-01 |
| GOTERM_BP_FAT | development of primary sexual characteristics                    | 2.30E-02 | 6.60E-01 |
| GOTERM_BP_FAT | positive regulation of leukocyte activation                      | 2.80E-02 | 7.20E-01 |
| GOTERM_BP_FAT | positive regulation of cell activation                           | 3.20E-02 | 7.50E-01 |
| GOTERM_BP_FAT | calcium ion-dependent exocytosis                                 | 3.20E-02 | 7.40E-01 |
| GOTERM_BP_FAT | cell junction assembly                                           | 3.20E-02 | 7.40E-01 |
| GOTERM_BP_FAT | spinal cord development                                          | 3.20E-02 | 7.40E-01 |
| GOTERM_BP_FAT | neuromuscular process                                            | 3.20E-02 | 7.40E-01 |
| GOTERM_BP_FAT | transmembrane receptor protein tyrosine kinase signaling pathway | 3.30E-02 | 7.30E-01 |
| GOTERM_BP_FAT | activation of immune response                                    | 3.30E-02 | 7.30E-01 |
| GOTERM_BP_FAT | positive regulation of T cell activation                         | 3.80E-02 | 7.70E-01 |
| GOTERM_BP_FAT | neuron differentiation                                           | 3.90E-02 | 7.60E-01 |
| GOTERM_BP_FAT | heart morphogenesis                                              | 3.90E-02 | 7.50E-01 |
| GOTERM_BP_FAT | skeletal system morphogenesis                                    | 4.10E-02 | 7.60E-01 |
| GOTERM_BP_FAT | blood vessel morphogenesis                                       | 4.40E-02 | 7.80E-01 |
| GOTERM_BP_FAT | cell activation                                                  | 4.50E-02 | 7.80E-01 |
| GOTERM_BP_FAT | regulation of lymphocyte activation                              | 4.80E-02 | 7.90E-01 |
| GOTERM_BP_FAT | monocarboxylic acid transport                                    | 5.00E-02 | 8.00E-01 |
| GOTERM_BP_FAT | response to yeast                                                | 5.10E-02 | 8.00E-01 |
| GOTERM_BP_FAT | protein maturation                                               | 5.50E-02 | 8.20E-01 |
| GOTERM_BP_FAT | sex differentiation                                              | 5.50E-02 | 8.20E-01 |
| GOTERM_BP_FAT | vesicle docking during exocytosis                                | 5.70E-02 | 8.20E-01 |
| GOTERM_BP_FAT | response to organic substance                                    | 6.00E-02 | 8.30E-01 |
| GOTERM_BP_FAT | leukocyte activation                                             | 6.00E-02 | 8.30E-01 |
| GOTERM_BP_FAT | cell-cell adhesion                                               | 6.30E-02 | 8.30E-01 |
| GOTERM_BP_FAT | regulation of leukocyte activation                               | 7.10E-02 | 8.60E-01 |
| GOTERM_BP_FAT | regulation of interleukin-2 production                           | 7.10E-02 | 8.60E-01 |
| GOTERM_BP_FAT | vesicle docking                                                  | 7.10E-02 | 8.60E-01 |
| GOTERM_BP_FAT | cell junction organization                                       | 7.10E-02 | 8.60E-01 |
| GOTERM_BP_FAT | hexose metabolic process                                         | 7.20E-02 | 8.60E-01 |
| GOTERM_BP_FAT | positive regulation of cellular biosynthetic process             | 7.30E-02 | 8.60E-01 |
| GOTERM_BP_FAT | protein maturation by peptide bond cleavage                      | 7.60E-02 | 8.60E-01 |



|               |                                                                       |          |          |
|---------------|-----------------------------------------------------------------------|----------|----------|
| GOTERM_BP_FAT | gonad development                                                     | 7.60E-02 | 8.60E-01 |
| GOTERM_BP_FAT | regulation of neuron differentiation                                  | 7.60E-02 | 8.60E-01 |
| GOTERM_BP_FAT | endothelial cell development                                          | 7.60E-02 | 8.60E-01 |
| GOTERM_BP_FAT | positive regulation of biosynthetic process                           | 7.80E-02 | 8.60E-01 |
| GOTERM_BP_FAT | nucleoside monophosphate biosynthetic process                         | 8.10E-02 | 8.70E-01 |
| GOTERM_BP_FAT | regulation of T cell activation                                       | 8.10E-02 | 8.60E-01 |
| GOTERM_BP_FAT | cell morphogenesis involved in neuron differentiation                 | 8.10E-02 | 8.60E-01 |
| GOTERM_BP_FAT | regulation of cell activation                                         | 8.20E-02 | 8.60E-01 |
| GOTERM_BP_FAT | regulation of system process                                          | 8.20E-02 | 8.60E-01 |
| GOTERM_BP_FAT | activation of plasma proteins involved in acute inflammatory response | 8.70E-02 | 8.70E-01 |
| GOTERM_BP_FAT | complement activation                                                 | 8.70E-02 | 8.70E-01 |
| GOTERM_BP_FAT | reproductive process in a multicellular organism                      | 8.90E-02 | 8.80E-01 |
| GOTERM_BP_FAT | multicellular organism reproduction                                   | 8.90E-02 | 8.80E-01 |
| GOTERM_BP_FAT | angiogenesis                                                          | 9.30E-02 | 8.80E-01 |
| GOTERM_BP_FAT | skeletal system development                                           | 9.30E-02 | 8.80E-01 |
| GOTERM_BP_FAT | cyclic nucleotide biosynthetic process                                | 9.50E-02 | 8.80E-01 |
| GOTERM_BP_FAT | membrane docking                                                      | 9.50E-02 | 8.80E-01 |
| GOTERM_BP_FAT | positive regulation of B cell activation                              | 9.50E-02 | 8.80E-01 |
| GOTERM_BP_FAT | sexual reproduction                                                   | 9.70E-02 | 8.80E-01 |
| GOTERM_CC_FAT | extracellular region part                                             | 1.00E-08 | 2.10E-06 |
| GOTERM_CC_FAT | extracellular region                                                  | 1.40E-07 | 1.50E-05 |
| GOTERM_CC_FAT | extracellular matrix                                                  | 3.20E-06 | 2.20E-04 |
| GOTERM_CC_FAT | proteinaceous extracellular matrix                                    | 4.40E-06 | 2.30E-04 |
| GOTERM_CC_FAT | extracellular space                                                   | 1.70E-05 | 7.20E-04 |
| GOTERM_CC_FAT | plasma membrane                                                       | 4.30E-03 | 1.40E-01 |
| GOTERM_CC_FAT | plasma membrane part                                                  | 9.80E-03 | 2.50E-01 |
| GOTERM_CC_FAT | extracellular matrix part                                             | 1.40E-02 | 3.00E-01 |
| GOTERM_CC_FAT | interstitial matrix                                                   | 1.70E-02 | 3.20E-01 |
| GOTERM_CC_FAT | actin cytoskeleton                                                    | 2.10E-02 | 3.50E-01 |
| GOTERM_CC_FAT | troponin complex                                                      | 5.10E-02 | 6.30E-01 |
| GOTERM_CC_FAT | vacuole                                                               | 6.20E-02 | 6.60E-01 |
| GOTERM_CC_FAT | cell projection                                                       | 6.50E-02 | 6.50E-01 |
| GOTERM_CC_FAT | basement membrane                                                     | 6.60E-02 | 6.30E-01 |
| GOTERM_CC_FAT | sarcomere                                                             | 8.50E-02 | 7.00E-01 |
| GOTERM_CC_FAT | cell soma                                                             | 8.50E-02 | 7.00E-01 |
| GOTERM_CC_FAT | intrinsic to plasma membrane                                          | 8.70E-02 | 6.90E-01 |
| GOTERM_CC_FAT | growth cone                                                           | 9.40E-02 | 7.00E-01 |
| GOTERM_CC_FAT | site of polarized growth                                              | 9.40E-02 | 7.00E-01 |
| GOTERM_CC_FAT | striated muscle thin filament                                         | 1.00E-01 | 7.00E-01 |

|               |                                                                                           |          |          |
|---------------|-------------------------------------------------------------------------------------------|----------|----------|
| GOTERM_MF_FAT | calcium ion binding                                                                       | 3.60E-07 | 1.50E-04 |
| GOTERM_MF_FAT | carbohydrate binding                                                                      | 3.50E-04 | 7.00E-02 |
| GOTERM_MF_FAT | polysaccharide binding                                                                    | 1.50E-03 | 1.90E-01 |
| GOTERM_MF_FAT | pattern binding                                                                           | 1.50E-03 | 1.90E-01 |
| GOTERM_MF_FAT | cation binding                                                                            | 1.90E-03 | 1.80E-01 |
| GOTERM_MF_FAT | metal ion binding                                                                         | 2.10E-03 | 1.60E-01 |
| GOTERM_MF_FAT | transcription factor activity                                                             | 2.50E-03 | 1.60E-01 |
| GOTERM_MF_FAT | ion binding                                                                               | 2.60E-03 | 1.40E-01 |
| GOTERM_MF_FAT | copper ion binding                                                                        | 3.50E-03 | 1.70E-01 |
| GOTERM_MF_FAT | sequence-specific DNA binding                                                             | 6.30E-03 | 2.50E-01 |
| GOTERM_MF_FAT | chemokine activity                                                                        | 1.00E-02 | 3.40E-01 |
| GOTERM_MF_FAT | chemokine receptor binding                                                                | 1.00E-02 | 3.40E-01 |
| GOTERM_MF_FAT | cytokine activity                                                                         | 3.00E-02 | 6.80E-01 |
| GOTERM_MF_FAT | low-density lipoprotein binding                                                           | 3.50E-02 | 7.10E-01 |
| GOTERM_MF_FAT | sugar binding                                                                             | 3.80E-02 | 7.10E-01 |
| GOTERM_MF_FAT | growth factor binding                                                                     | 3.90E-02 | 6.90E-01 |
| GOTERM_MF_FAT | angiotensin receptor binding                                                              | 5.00E-02 | 7.60E-01 |
| GOTERM_MF_FAT | zymosan binding                                                                           | 5.00E-02 | 7.60E-01 |
| GOTERM_MF_FAT | complement binding                                                                        | 5.00E-02 | 7.60E-01 |
| GOTERM_MF_FAT | type 1 angiotensin receptor binding                                                       | 5.00E-02 | 7.60E-01 |
| GOTERM_MF_FAT | glycosaminoglycan binding                                                                 | 5.20E-02 | 7.50E-01 |
| GOTERM_MF_FAT | hydrolase activity, acting on carbon-nitrogen (but not peptide) bonds, in cyclic amidines | 6.00E-02 | 7.80E-01 |
| GOTERM_MF_FAT | lipoprotein binding                                                                       | 6.00E-02 | 7.80E-01 |
| GOTERM_MF_FAT | pancreatic ribonuclease activity                                                          | 6.70E-02 | 8.00E-01 |
| GOTERM_MF_FAT | phosphorus-oxygen lyase activity                                                          | 8.90E-02 | 8.70E-01 |
| GOTERM_MF_FAT | endoribonuclease activity, producing 3'-phosphomonoesters                                 | 8.90E-02 | 8.70E-01 |
| GOTERM_MF_FAT | transcription regulator activity                                                          | 9.00E-02 | 8.60E-01 |
| GOTERM_MF_FAT | RPTP-like protein binding                                                                 | 9.70E-02 | 8.70E-01 |
| GOTERM_MF_FAT | scavenger receptor activity                                                               | 9.90E-02 | 8.60E-01 |

**Table S14. The significant gene set from DAVID enrichment test with DEGs from **pituitary-gland** tissue (FDR < 0.2) and several gene-set databases such as gene ontology and KEGG.**

| Category      | Term                                                  | P-value  | Benjamini |
|---------------|-------------------------------------------------------|----------|-----------|
| KEGG_PATHWAY  | Cell adhesion molecules (CAMs)                        | 1.90E-02 | 8.20E-01  |
| KEGG_PATHWAY  | Neuroactive ligand-receptor interaction               | 2.50E-02 | 6.60E-01  |
| GOTERM_BP_FAT | muscle organ development                              | 7.00E-04 | 4.70E-01  |
| GOTERM_BP_FAT | cell wall macromolecule metabolic process             | 9.50E-04 | 3.50E-01  |
| GOTERM_BP_FAT | cell wall macromolecule catabolic process             | 9.50E-04 | 3.50E-01  |
| GOTERM_BP_FAT | regulation of cell adhesion                           | 1.10E-03 | 2.90E-01  |
| GOTERM_BP_FAT | striated muscle tissue development                    | 1.30E-03 | 2.50E-01  |
| GOTERM_BP_FAT | muscle tissue development                             | 1.60E-03 | 2.50E-01  |
| GOTERM_BP_FAT | hormone transport                                     | 1.60E-03 | 2.20E-01  |
| GOTERM_BP_FAT | tissue morphogenesis                                  | 3.20E-03 | 3.40E-01  |
| GOTERM_BP_FAT | regulation of cell growth                             | 4.50E-03 | 4.10E-01  |
| GOTERM_BP_FAT | ventricular cardiac muscle morphogenesis              | 6.50E-03 | 4.90E-01  |
| GOTERM_BP_FAT | defense response                                      | 6.80E-03 | 4.60E-01  |
| GOTERM_BP_FAT | cytolysis                                             | 1.10E-02 | 6.00E-01  |
| GOTERM_BP_FAT | cardiac muscle tissue morphogenesis                   | 1.10E-02 | 6.00E-01  |
| GOTERM_BP_FAT | muscle tissue morphogenesis                           | 1.10E-02 | 6.00E-01  |
| GOTERM_BP_FAT | gonad development                                     | 1.20E-02 | 5.90E-01  |
| GOTERM_BP_FAT | negative regulation of cell adhesion                  | 1.30E-02 | 6.00E-01  |
| GOTERM_BP_FAT | biological adhesion                                   | 1.40E-02 | 6.10E-01  |
| GOTERM_BP_FAT | cell adhesion                                         | 1.40E-02 | 6.10E-01  |
| GOTERM_BP_FAT | development of primary sexual characteristics         | 1.50E-02 | 6.10E-01  |
| GOTERM_BP_FAT | reproductive structure development                    | 1.60E-02 | 6.10E-01  |
| GOTERM_BP_FAT | regulation of growth                                  | 2.70E-02 | 7.70E-01  |
| GOTERM_BP_FAT | sex differentiation                                   | 3.10E-02 | 8.00E-01  |
| GOTERM_BP_FAT | defense response to bacterium                         | 3.10E-02 | 8.00E-01  |
| GOTERM_BP_FAT | reproductive developmental process                    | 3.20E-02 | 7.90E-01  |
| GOTERM_BP_FAT | positive regulation of cellular biosynthetic process  | 4.20E-02 | 8.60E-01  |
| GOTERM_BP_FAT | regulation of hormone levels                          | 4.20E-02 | 8.50E-01  |
| GOTERM_BP_FAT | positive regulation of cell proliferation             | 4.30E-02 | 8.40E-01  |
| GOTERM_BP_FAT | positive regulation of biosynthetic process           | 4.40E-02 | 8.40E-01  |
| GOTERM_BP_FAT | regulation of cell-substrate adhesion                 | 4.80E-02 | 8.40E-01  |
| GOTERM_BP_FAT | catecholamine transport                               | 4.90E-02 | 8.40E-01  |
| GOTERM_BP_FAT | cardiac muscle tissue development                     | 5.10E-02 | 8.40E-01  |
| GOTERM_BP_FAT | heart morphogenesis                                   | 5.10E-02 | 8.40E-01  |
| GOTERM_BP_FAT | chordate embryonic development                        | 5.20E-02 | 8.40E-01  |
| GOTERM_BP_FAT | embryonic development ending in birth or egg hatching | 5.40E-02 | 8.30E-01  |

|               |                                                           |          |          |
|---------------|-----------------------------------------------------------|----------|----------|
| GOTERM_BP_FAT | endocrine system development                              | 5.40E-02 | 8.30E-01 |
| GOTERM_BP_FAT | positive regulation of cell adhesion                      | 5.70E-02 | 8.30E-01 |
| GOTERM_BP_FAT | rhythmic process                                          | 6.00E-02 | 8.40E-01 |
| GOTERM_BP_FAT | thyroid hormone metabolic process                         | 6.10E-02 | 8.40E-01 |
| GOTERM_BP_FAT | skeletal muscle tissue development                        | 7.40E-02 | 8.80E-01 |
| GOTERM_BP_FAT | skeletal muscle organ development                         | 7.40E-02 | 8.80E-01 |
| GOTERM_BP_FAT | regulation of cellular component size                     | 7.60E-02 | 8.80E-01 |
| GOTERM_BP_FAT | monoamine transport                                       | 8.40E-02 | 9.00E-01 |
| GOTERM_BP_FAT | adrenal gland development                                 | 8.40E-02 | 9.00E-01 |
| GOTERM_BP_FAT | negative regulation of signal transduction                | 8.60E-02 | 9.00E-01 |
| GOTERM_BP_FAT | positive regulation of macromolecule metabolic process    | 8.80E-02 | 9.00E-01 |
| GOTERM_BP_FAT | cellular amino acid derivative metabolic process          | 8.80E-02 | 8.90E-01 |
| GOTERM_BP_FAT | positive regulation of macromolecule biosynthetic process | 8.80E-02 | 8.90E-01 |
| GOTERM_BP_FAT | negative regulation of cell communication                 | 9.50E-02 | 9.00E-01 |
| GOTERM_BP_FAT | response to bacterium                                     | 9.80E-02 | 9.00E-01 |
| GOTERM_CC_FAT | extracellular region                                      | 5.20E-10 | 7.30E-08 |
| GOTERM_CC_FAT | external side of plasma membrane                          | 7.00E-05 | 4.90E-03 |
| GOTERM_CC_FAT | extracellular region part                                 | 3.40E-04 | 1.60E-02 |
| GOTERM_CC_FAT | cell surface                                              | 3.80E-04 | 1.30E-02 |
| GOTERM_CC_FAT | plasma membrane                                           | 1.90E-03 | 5.20E-02 |
| GOTERM_CC_FAT | extracellular matrix                                      | 1.40E-02 | 2.80E-01 |
| GOTERM_CC_FAT | plasma membrane part                                      | 2.50E-02 | 4.00E-01 |
| GOTERM_CC_FAT | proteinaceous extracellular matrix                        | 2.90E-02 | 4.10E-01 |
| GOTERM_CC_FAT | extracellular space                                       | 3.70E-02 | 4.50E-01 |
| GOTERM_CC_FAT | extracellular matrix part                                 | 4.40E-02 | 4.70E-01 |
| GOTERM_CC_FAT | apical part of cell                                       | 5.50E-02 | 5.10E-01 |
| GOTERM_CC_FAT | anchored to membrane                                      | 9.00E-02 | 6.70E-01 |
| GOTERM_CC_FAT | apical plasma membrane                                    | 9.80E-02 | 6.70E-01 |
| GOTERM_MF_FAT | neuropeptide hormone activity                             | 3.70E-03 | 6.50E-01 |
| GOTERM_MF_FAT | lysozyme activity                                         | 8.60E-03 | 7.00E-01 |
| GOTERM_MF_FAT | identical protein binding                                 | 9.50E-03 | 5.90E-01 |
| GOTERM_MF_FAT | cell surface binding                                      | 1.50E-02 | 6.50E-01 |
| GOTERM_MF_FAT | hormone activity                                          | 1.90E-02 | 6.60E-01 |
| GOTERM_MF_FAT | protein homodimerization activity                         | 2.30E-02 | 6.60E-01 |
| GOTERM_MF_FAT | extracellular matrix structural constituent               | 2.50E-02 | 6.40E-01 |
| GOTERM_MF_FAT | enzyme inhibitor activity                                 | 4.60E-02 | 8.00E-01 |
| GOTERM_MF_FAT | protein dimerization activity                             | 4.60E-02 | 7.70E-01 |
| GOTERM_MF_FAT | cytoskeletal protein binding                              | 4.60E-02 | 7.70E-01 |
| GOTERM_MF_FAT | peptidase inhibitor activity                              | 5.90E-02 | 8.10E-01 |

|               |                                                         |          |          |
|---------------|---------------------------------------------------------|----------|----------|
| GOTERM_MF_FAT | actin binding                                           | 8.00E-02 | 8.80E-01 |
| GOTERM_MF_FAT | transmembrane receptor protein tyrosine kinase activity | 1.00E-01 | 9.10E-01 |

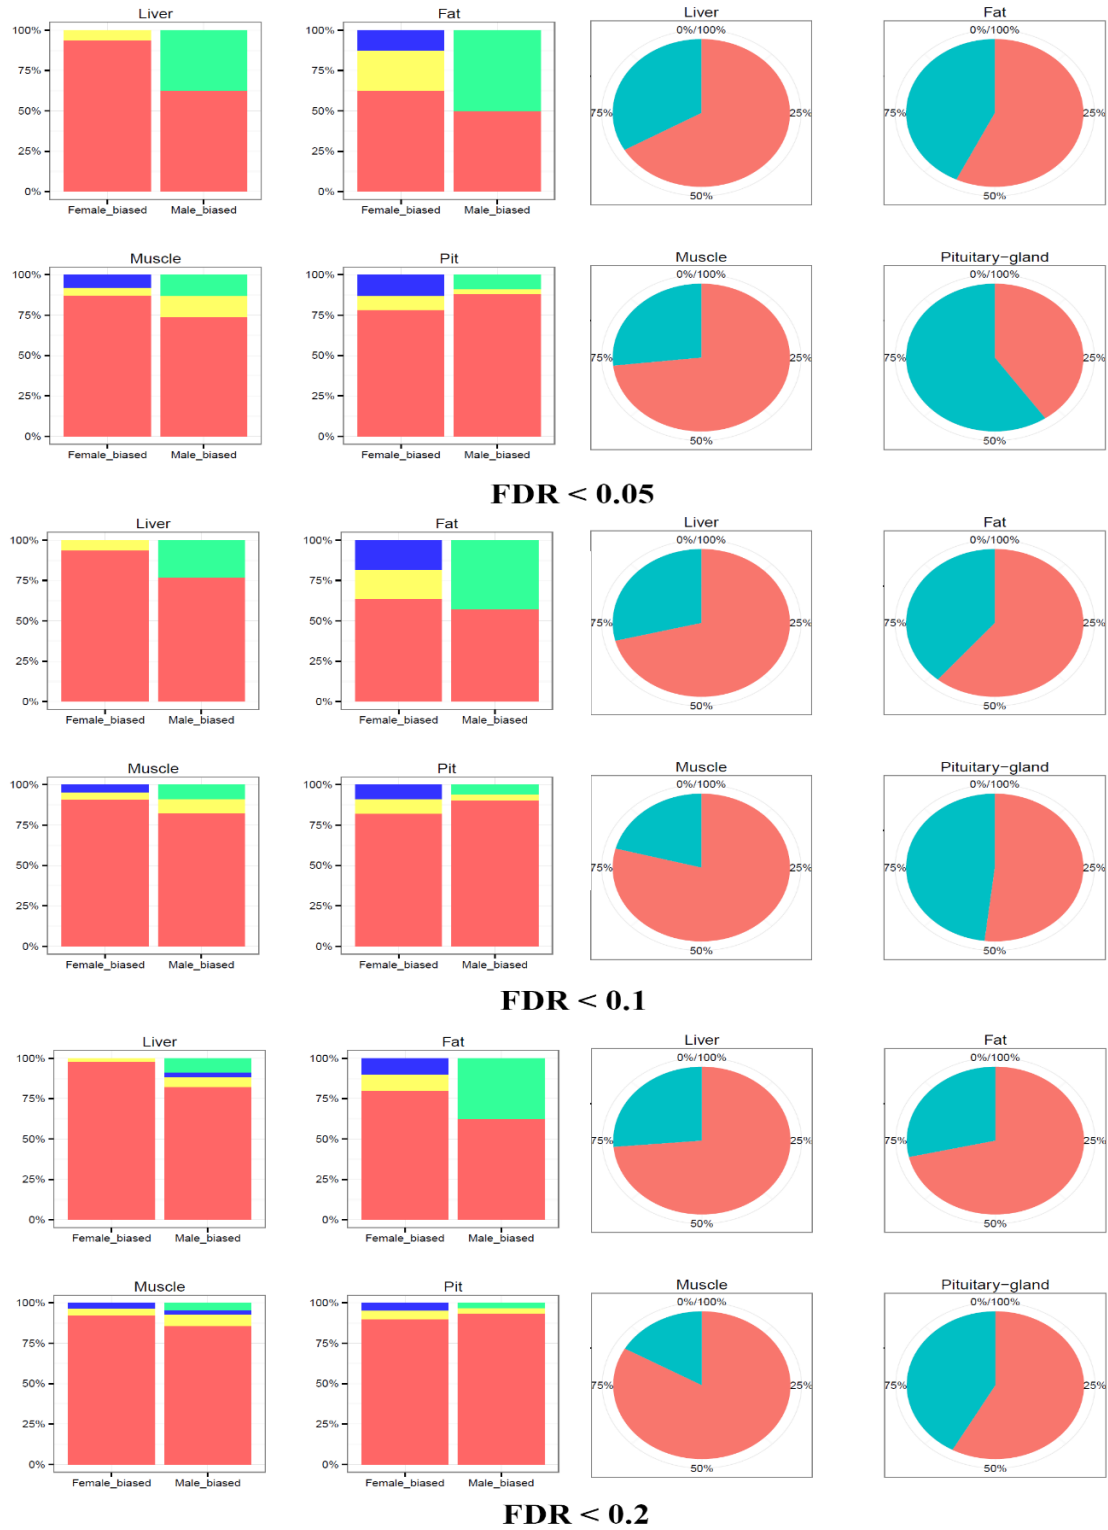

**Figure S1. Exploration of gender biases and chromosomal effects on tissues**

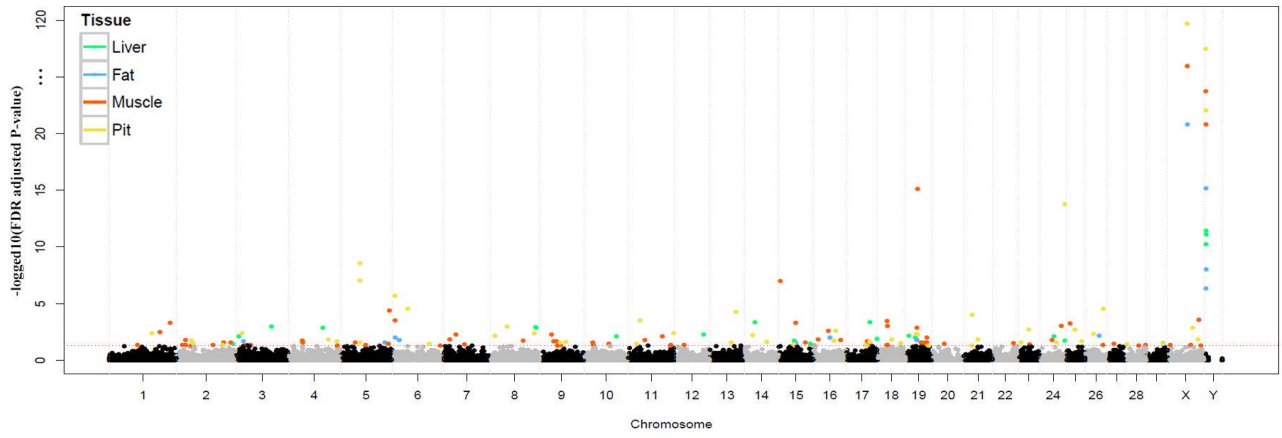

**Figure S2. Manhattan plot for allocating sexual dimorphic genes from located chromosomal position with y-axis is a  $-\log_{10}$  transformed FDR adjusting P-values**

Significant sexual dimorphic genes in each chromosome

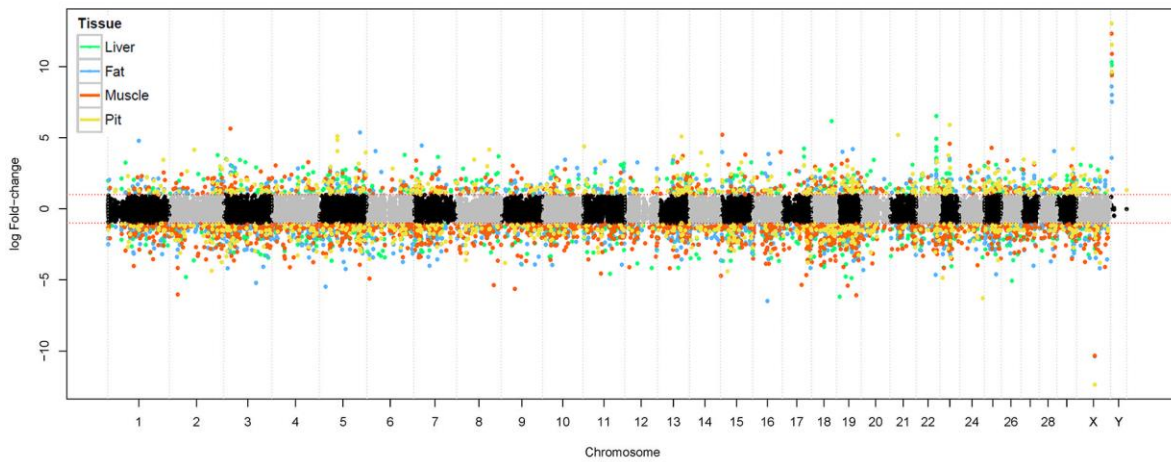

Figure S3. Overlapped Manhattan plot across the all tissues for allocating sexual dimorphic genes from located chromosomal position with y-axis is a log2 fold changes between female and male. Total 13,148 genes were visualized in this plot.



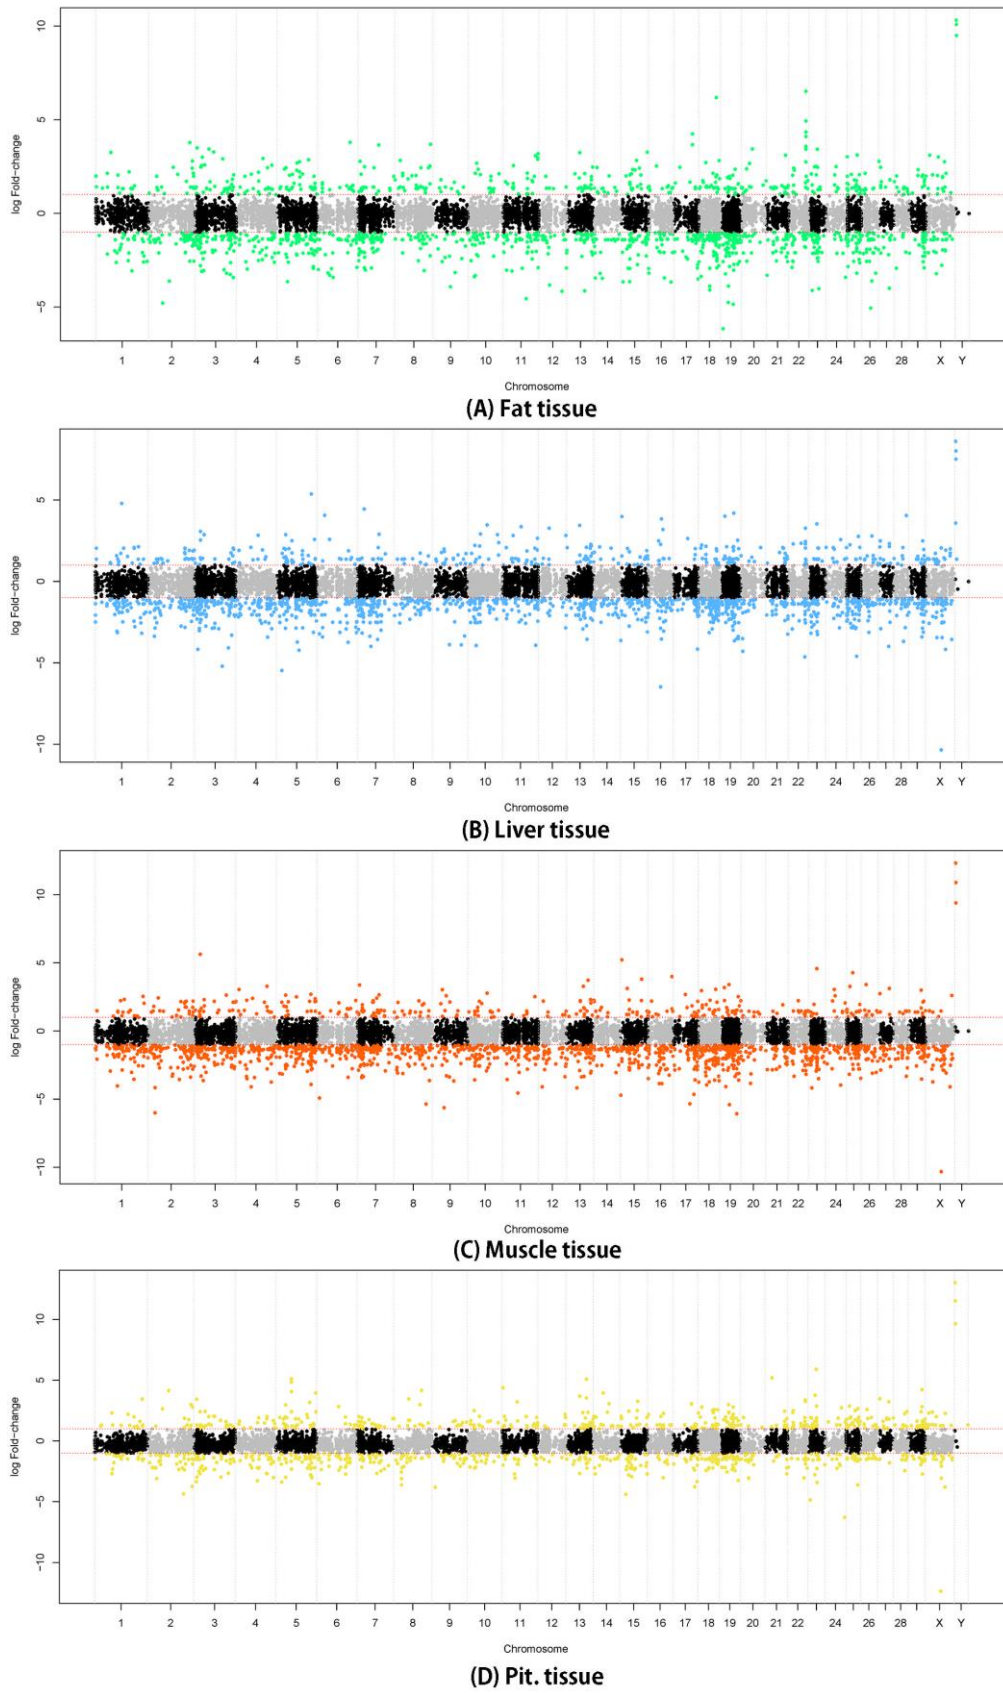

**Figure S4. Separated Manhattan plots for significantly observed genes in M1**

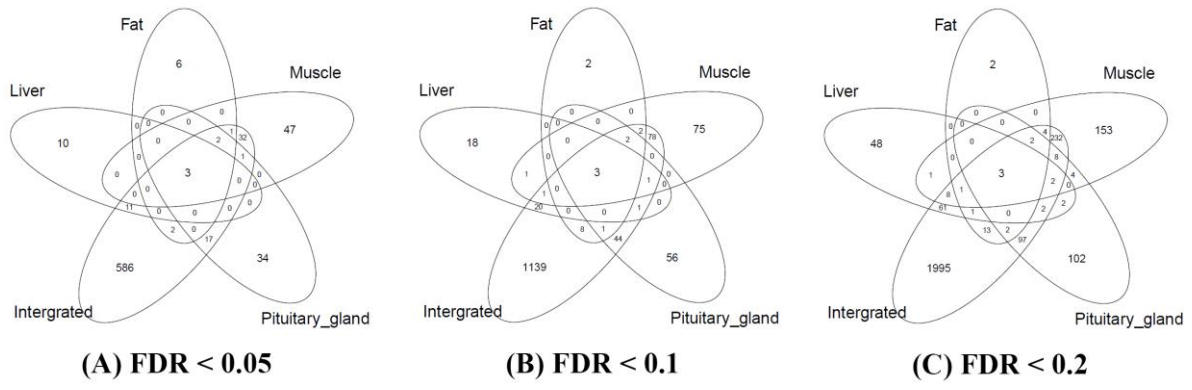

**Figure S5. Venn-diagram for M1 (each-tissue model) and M2 (integrated model)**

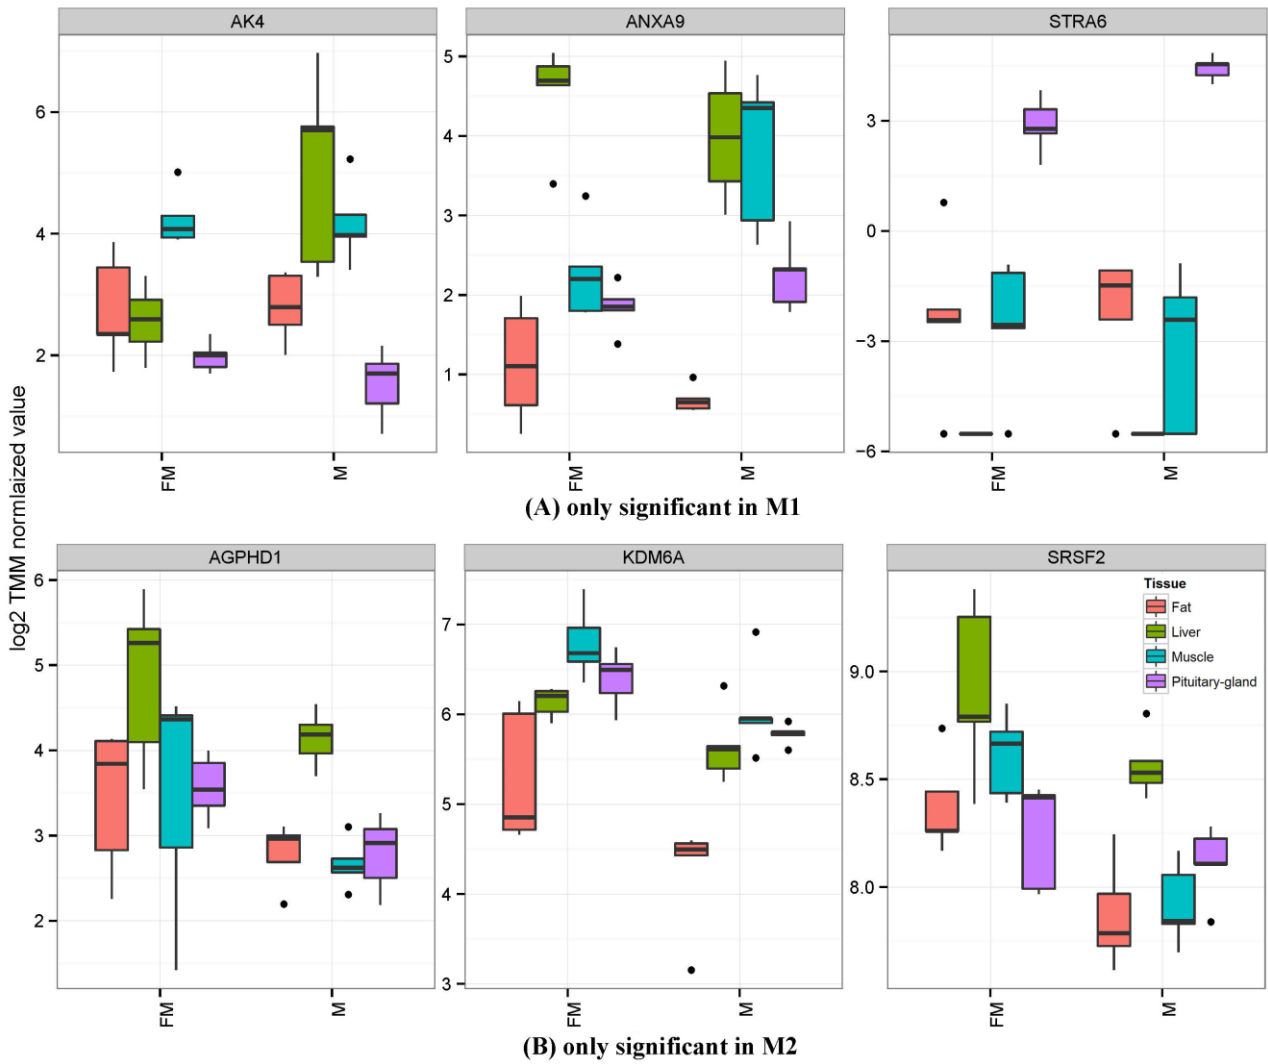

**Figure S6.** Box plots for comparison between M1 and M2. (A) Representative significant genes in M1 (tissue separately model). (B) Representative significant genes in M2 (Integrated model). Y-axis represent normalized values by TMM normalization using edgeR and X-axis represent gender. Four colored lines were drawn in each tissues, which is connected between average of female and male expression values, respectively.

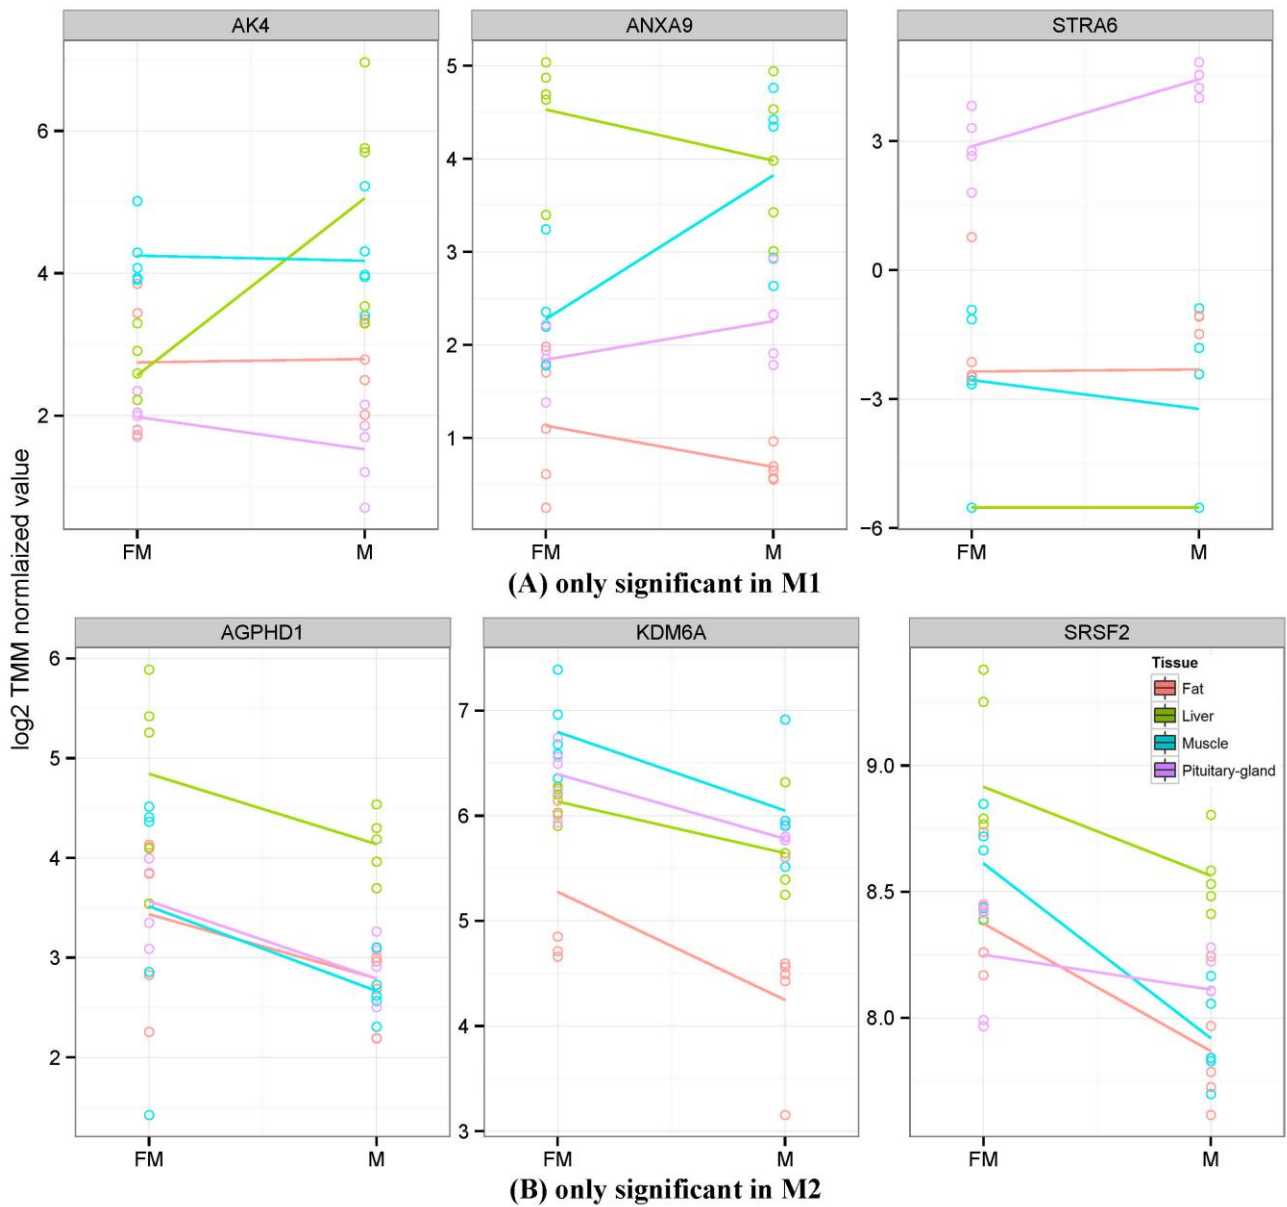

**Figure S7.** Line plots for comparison between M1 and M2. (A) Representative significant genes in M1 (tissue separately model). (B) Representative significant genes in M2 (Integrated model). Y-axis represent normalized values by TMM normalization using edgeR and X-axis represent gender. Four colored lines were drawn in each tissues, which is connected between average of female and male expression values, respectively.

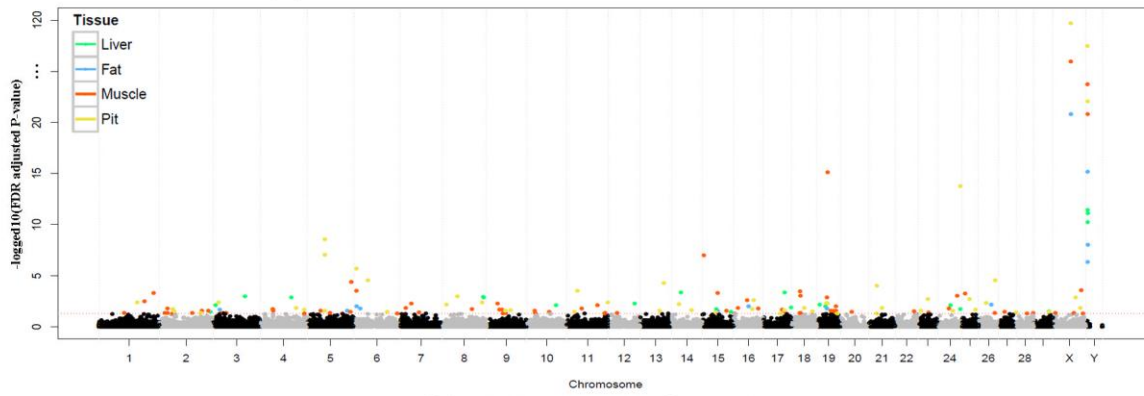

(A) Manhattan plot from M1

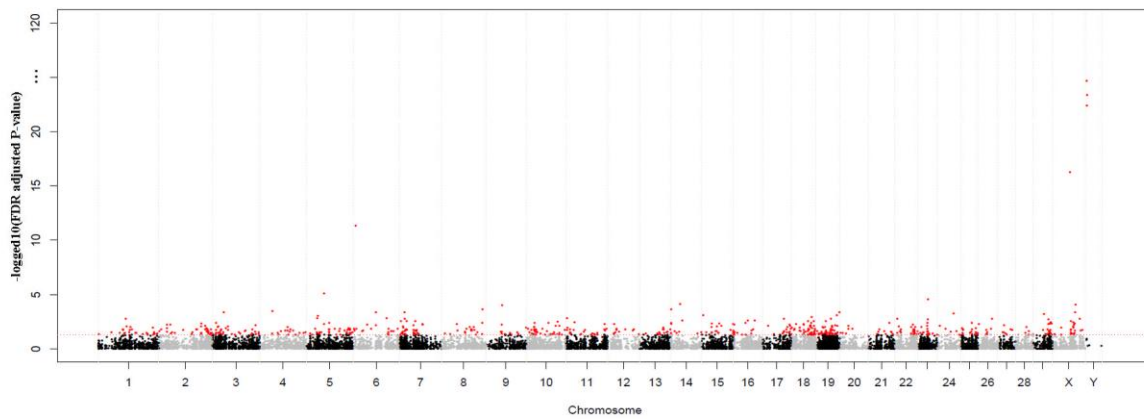

(B) Manhattan plot from M2

Figure S8. Manhattan plots. (A) FDR adjusted P-value of the M1 method for each sampled tissue and chromosomal location. (B) FDR adjusted P-value of the M2 method. Red marked genes are significant in M2 under  $FDR < 0.05$ .

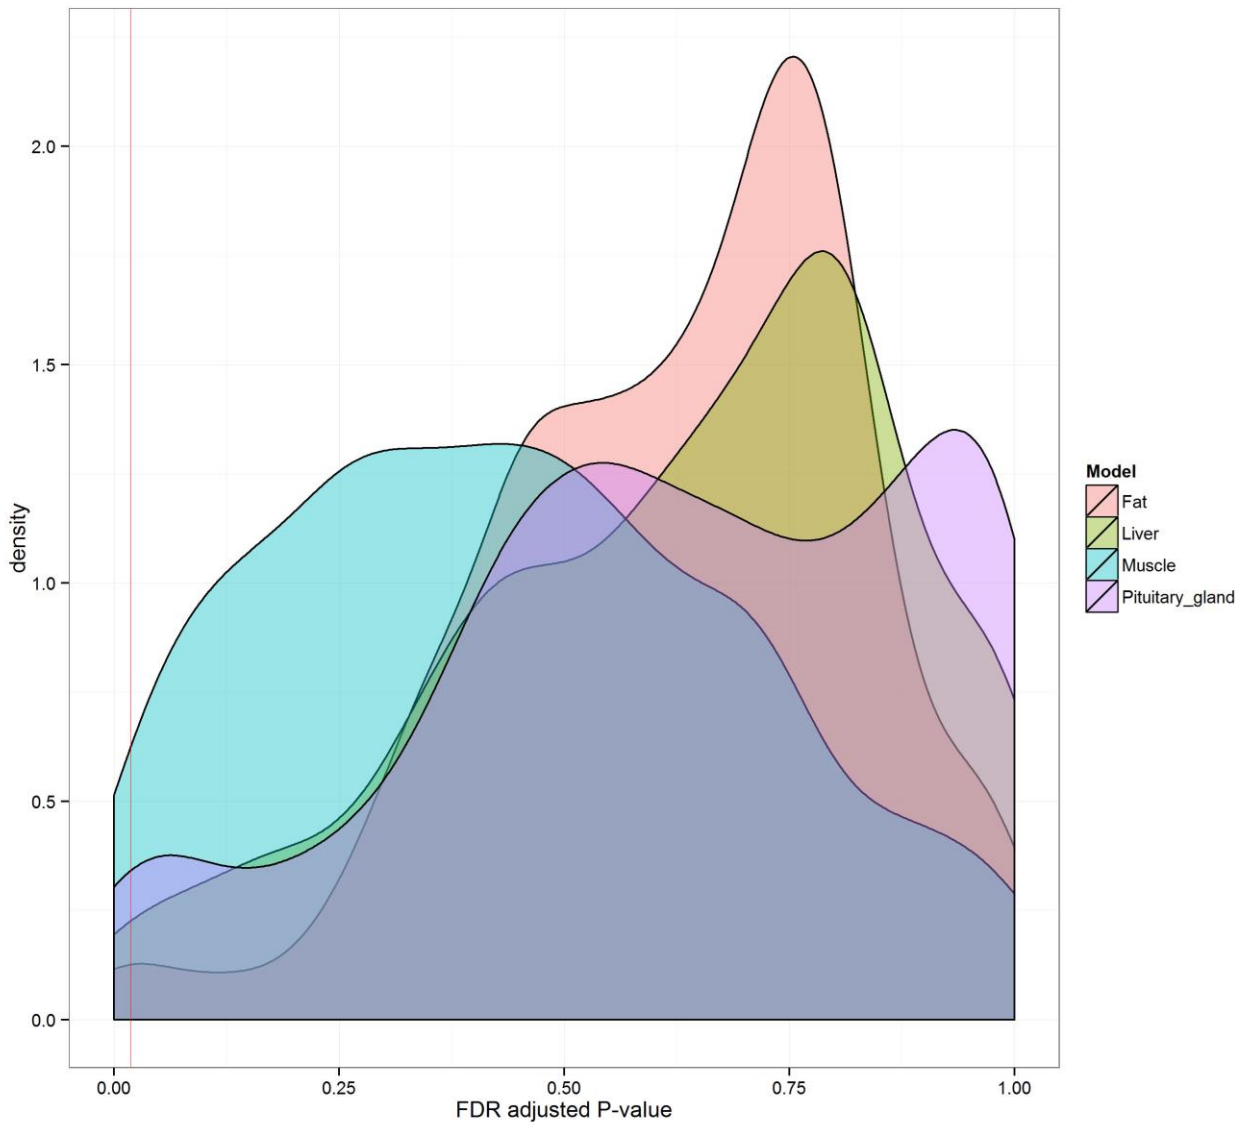

**Figure S9. Visualizing densities of the FDR adjusted p-values from M1 for 655 detected DEGs from M2. The red-vertical line represents 5% significance level.**

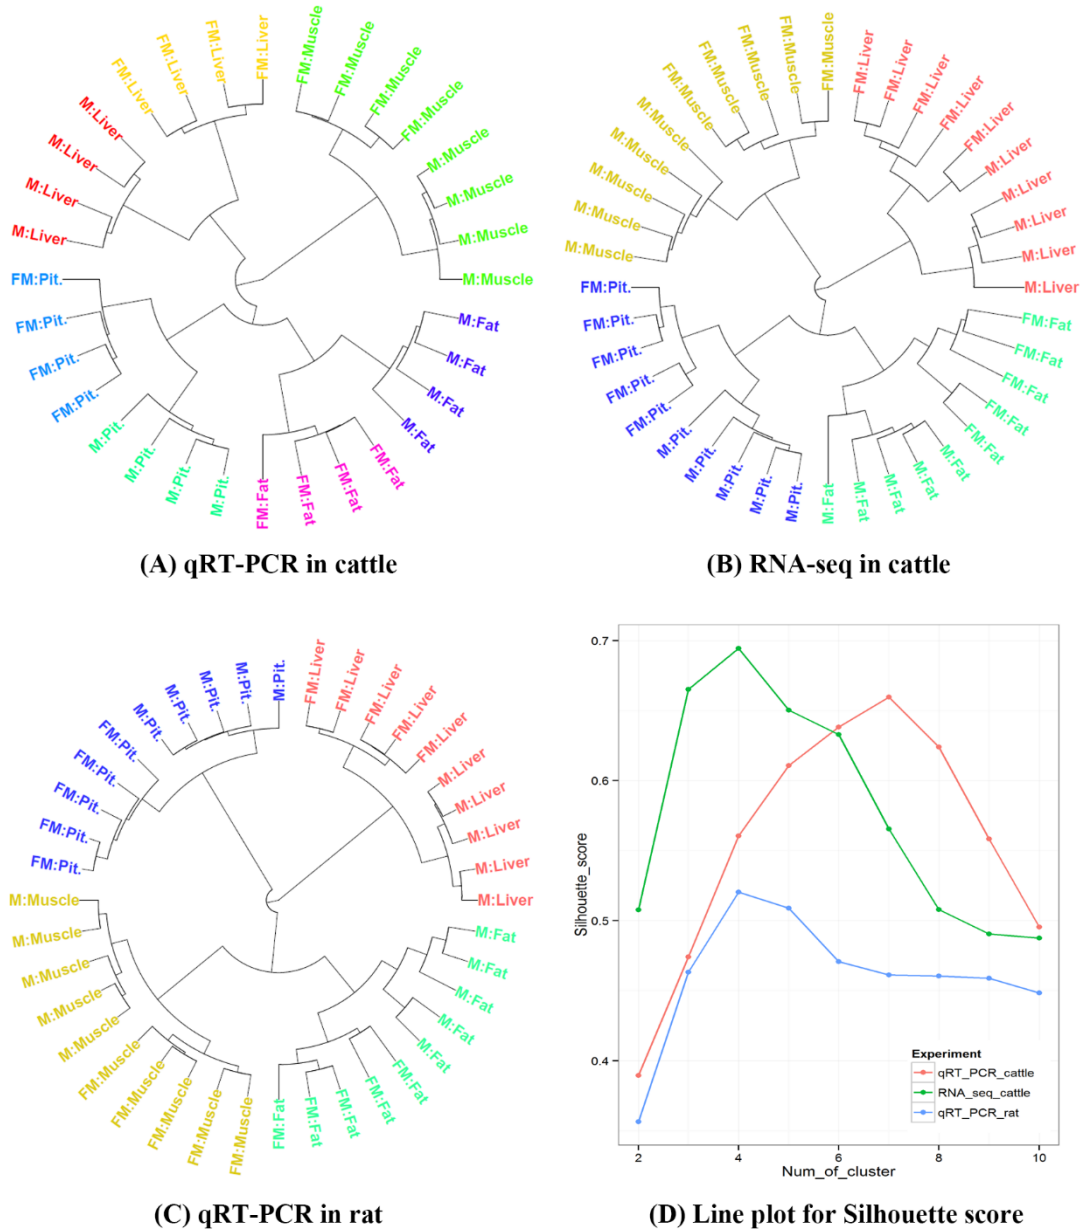

**Figure S10. Hierarchical clustering analysis of 40 sexual dimorphic genes for qRT-PCR validation of RNA-seq results. Three trees were visualized with optimal number of clusters based on the Silhouette score. The colors represent estimated groups derived from hierarchical clustering and its optimal number of clusters, respectively. (A) qRT-PCR for cattle species with 32 samples ( $k=7$ ). (B) RNA-seq result for cattle species ( $k=4$ ). (C) qRT-PCR for rat species with 40 samples ( $k=4$ ). (D) Silhouette score plot for detecting optimal number of clusters.**

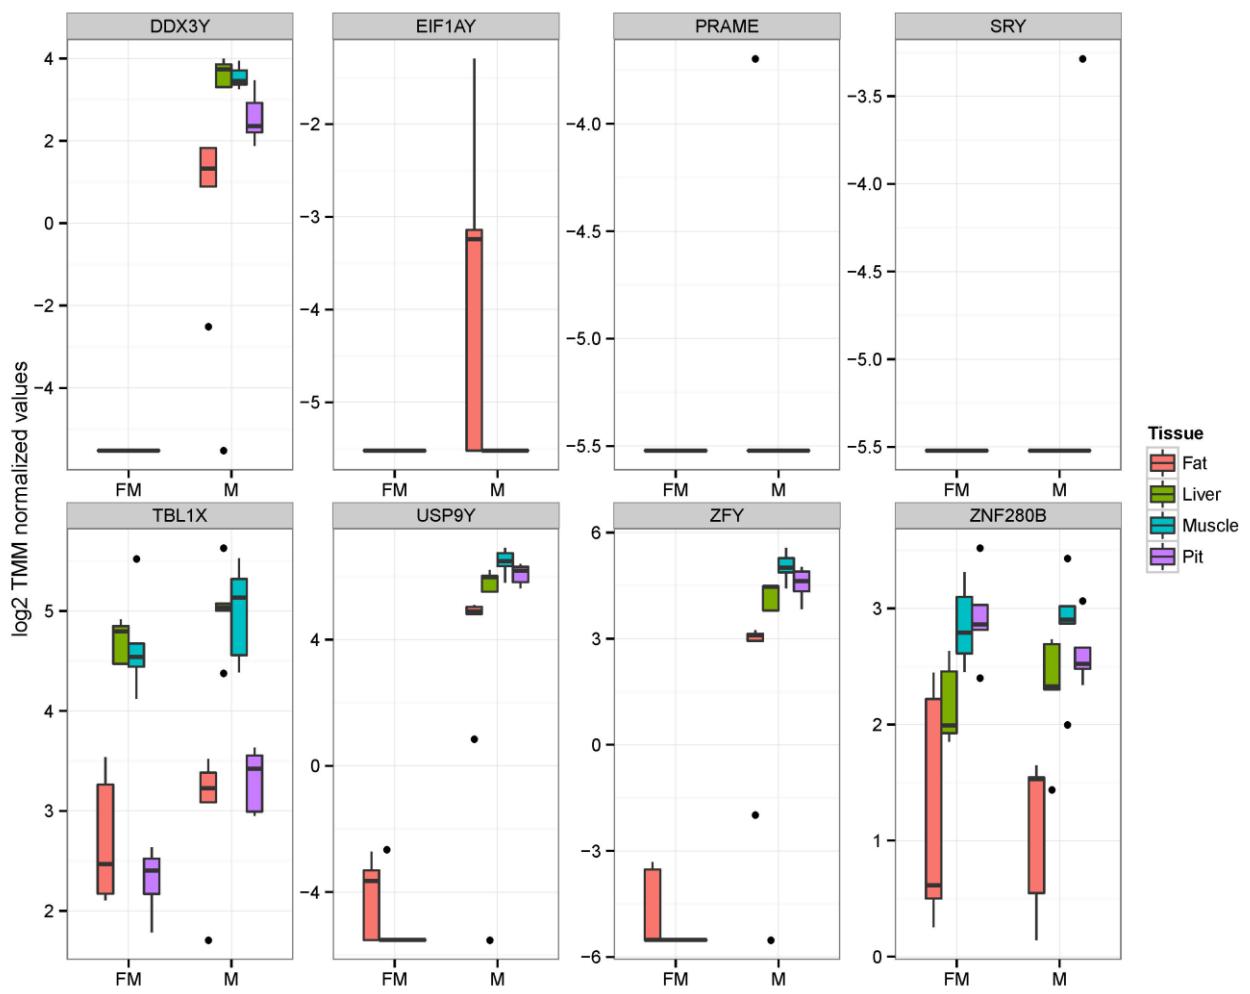

Figure S11. Gene expression patterns for annotating 8 Y-linked genes based on bosTau7 genome.



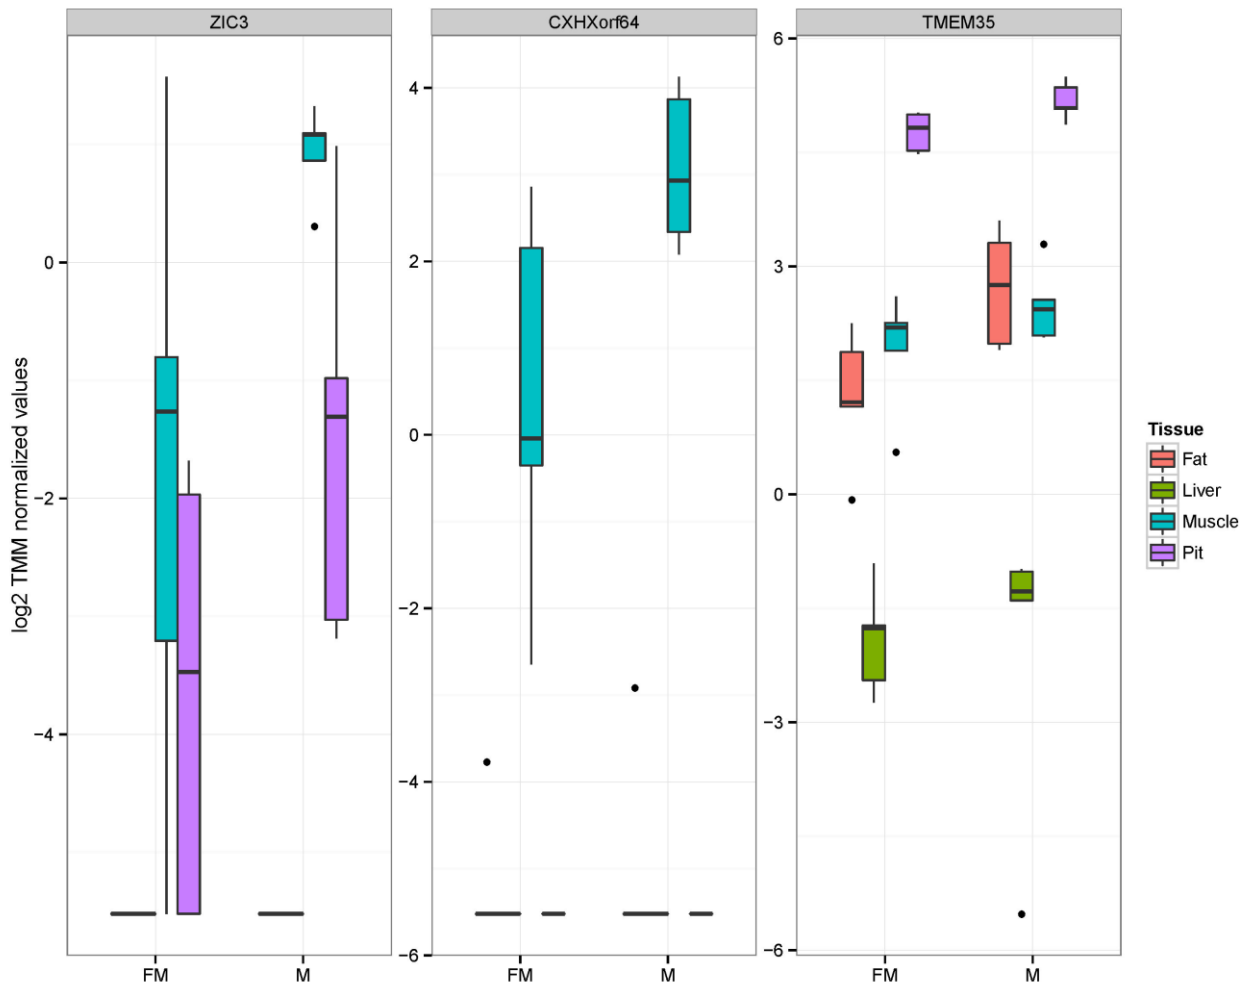

**Figure S12. Detected three male-over-expressed genes (FDR adjusted P-value < 0.1)**

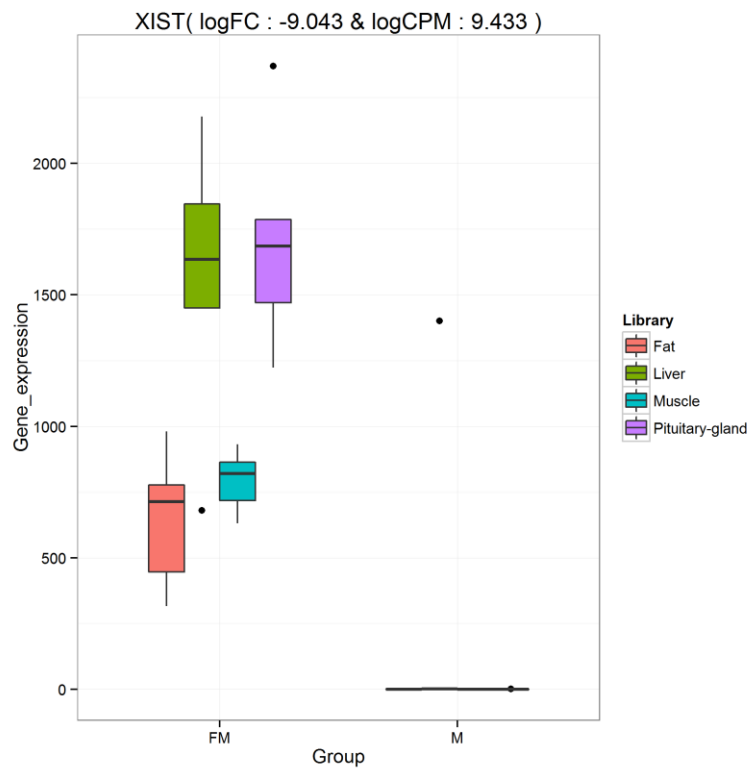

Figure S13. Box-plot describing gene expression of XIST

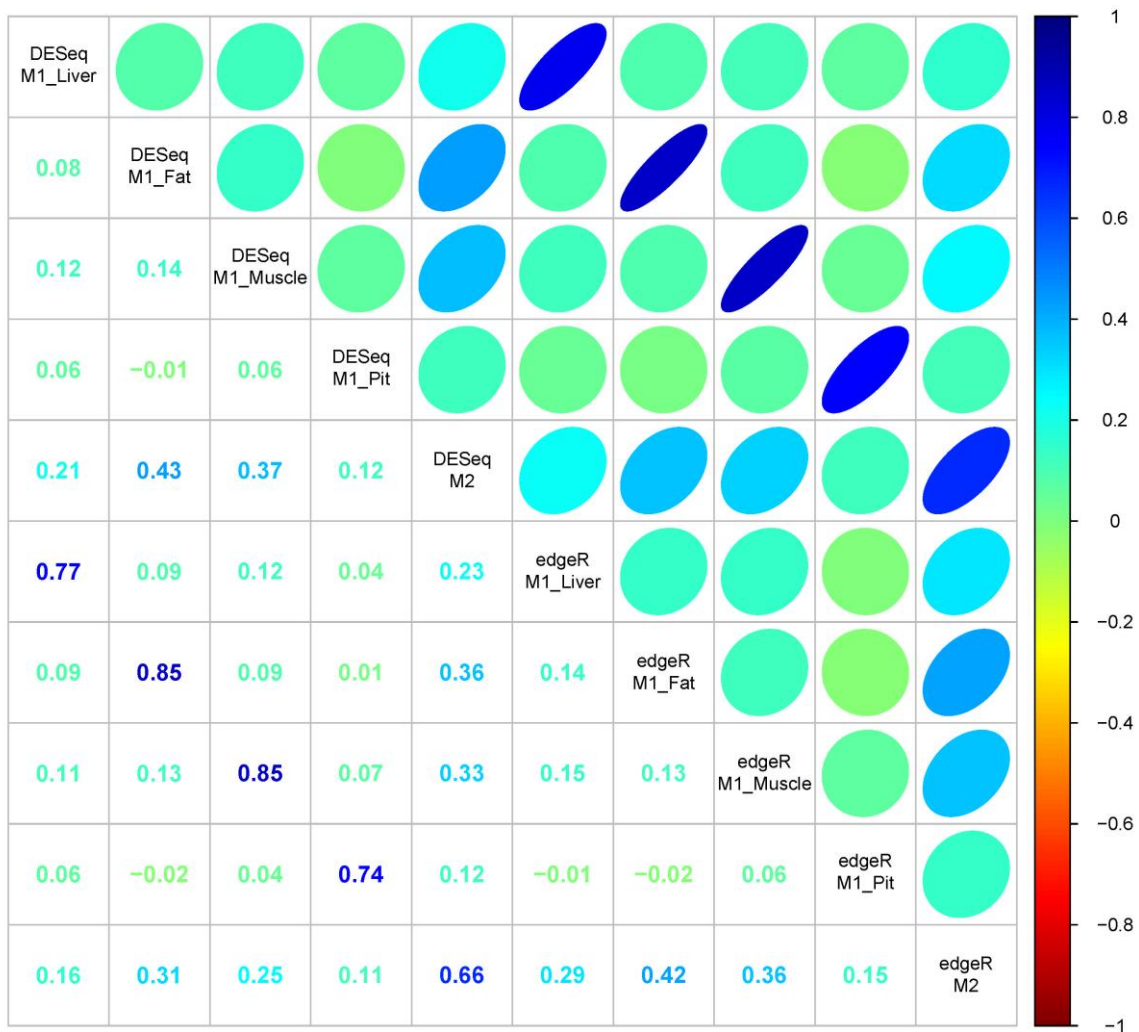

**Figure S14.** The correlation plot for comparison between two statistical analysis tools such as edgeR and DESeq2. Spearman correlation coefficients were employed with each P-value derived from different hypothesis tests. Higher correlation coefficients (0.66 to 0.85) were observed in same hypothesis tests across the edgeR and DESeq2.

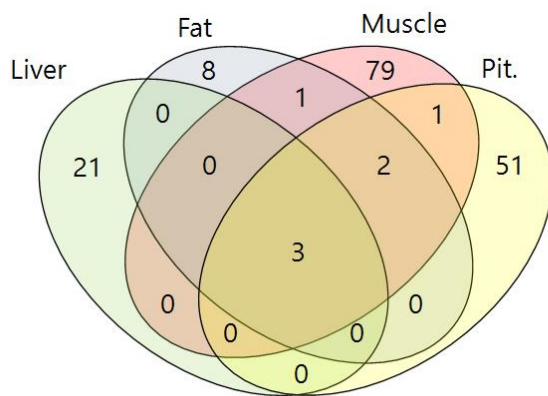

(A) edgeR results

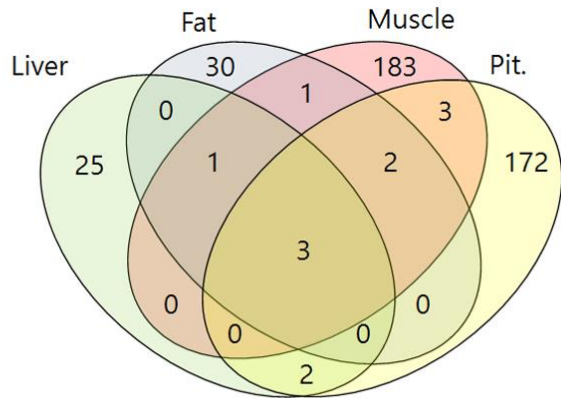

(B) DESeq2 results

Figure S15. Venn diagram of DEGs list (FDR adjusted P-value < 0.05) for comparison between two statistical analysis tools such as edgeR and DESeq2. In the DESeq2, relatively large number of DEGs were significantly detected compared to the edgeR.

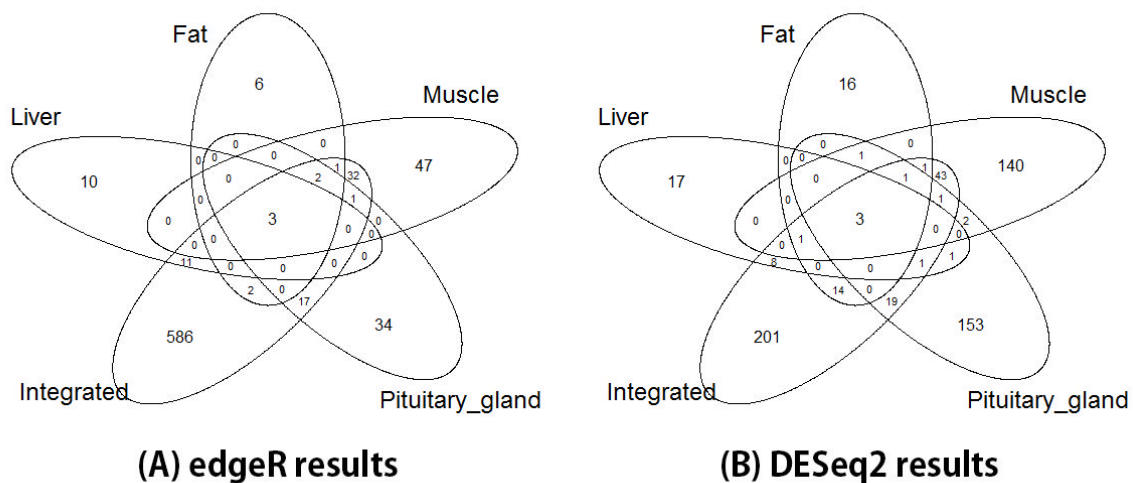

**Figure S16. Venn diagram of DEGs list (FDR adjusted P-value < 0.05) for comparison between two statistical analysis tools such as edgeR and DESeq2. The larger number of detected genes in M1 than M2, which were observed in edgeR and DESeq2.**

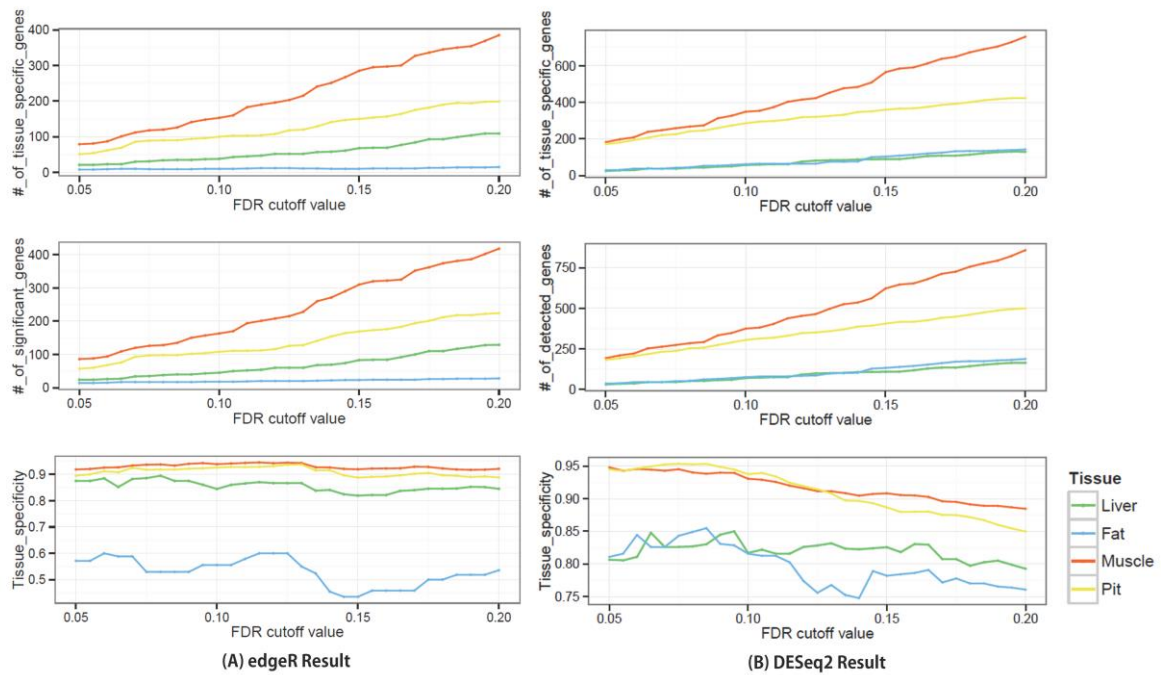

**Figure S17. Tissue specificity of the detected DEGs using edgeR and DESeq2, respectively. Number of detected genes and tissue specific genes by FDR cutoff and their tissue specificity calculation. While edgeR and DESeq2 generate almost same result (Relatively Higher tissue specificity of the Muscle and pituitary gland and relatively lower tissue specificity of the liver and fat tissue)**

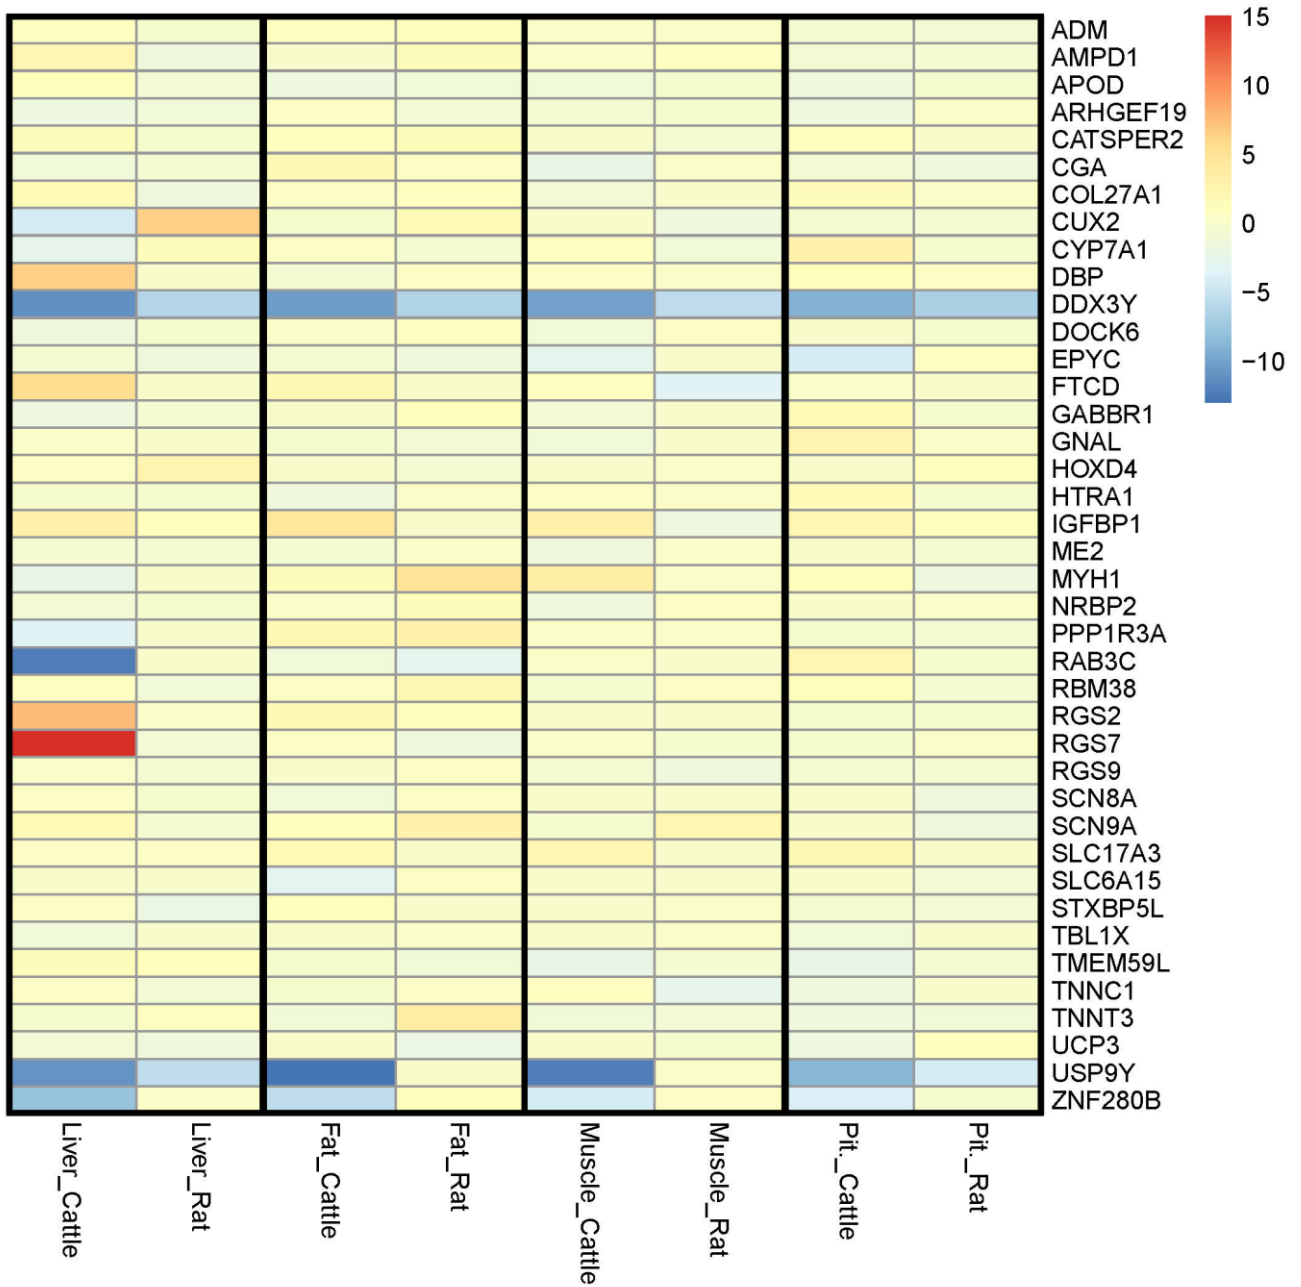

Figure S18. Comparative heatmap between bovine and rat qRT-PCR results. The intensities represent FM:M ratio (Female gene expression / Male gene expression).
